# Supplementary material for: Secondary and primary metabolites reveal putative resistance-associated biomarkers against Erysiphe necator in resistant grapevine genotypes
Source: Front Plant Sci. 2023 Jan 31;14:1112157. doi: 10.3389/fpls.2023.1112157 (PMC9927228; doi:10.3389/fpls.2023.1112157)
Supplement: Supplementary file 4 [file DataSheet_4.xlsx]

## Sheet: Sheet1
Supplementary Table 4. Semi-quantification of volatile compounds in grapevine samples in inoculated (I) and not-inoculated (NI) samples at different time points, hours post- inoculation (hpi) for each genotype in both years.
sample	year	penten-3-one	hexanal	2-pentenal	trans-3-hexenal	cis-3-hexenal	1-penten-3-ol	2-hexenal-izomer1	2-hexenal-izomer2	cis-3-hexenylacetate	2-penten-1-ol	6-methyl-5-hepten-2-one	3-hexen-1-ol-cis	2,4-hexadienal-isomer1_(trans,cis)	2,4-hexadienal-isomer2_(trans,trans)	1-heptanol	2,4-heptadienal	ylangene	2_octenal_(E)	2,4_heptadienal_(trans,_trans)	1-hexanol-2-ethyl	beta_bourbonene	1-pentanol,3-ethyl-4-methyl	benzaldehyde	unknown-1	linalool	1-octanol	beta-ciclocitral	1-nonanol	neral	3-nonen-1-ol(cis)	alpha_terpineol	benzaldehyde,ethyl	2(5H)_furanone,_5_ethyl	methyl_salicylate	(E)_geranyl_acetone	benzyl_alchool	phenethyl_alcohol	b-ionone-epoxide	trans-beta-ionone	heptanoic_acid	hexenoic_acid_(3Z)	unknown-7	unknown-31	unknown-26	tetradecanoic_acid,_ethyl_ester	octanoic_acid	phytone	nonanoic-acid
		µg/kg	µg/kg	µg/kg	µg/kg	µg/kg	µg/kg	µg/kg	µg/kg	µg/kg	µg/kg	µg/kg	µg/kg	µg/kg	µg/kg	µg/kg	µg/kg	µg/kg	µg/kg	µg/kg	µg/kg	µg/kg	µg/kg	µg/kg	µg/kg	µg/kg	µg/kg	µg/kg	µg/kg	µg/kg	µg/kg	µg/kg	µg/kg	µg/kg	µg/kg	µg/kg	µg/kg	µg/kg	µg/kg	µg/kg	µg/kg	µg/kg	µg/kg	µg/kg	µg/kg	µg/kg	µg/kg	µg/kg	µg/kg
BC4_0hpi_I_bio1+2+3	2021	491.296	1451.94		239.786	231.342	0.682435		5829.37		41.0593	75.7068	10.2409	1.29686	34.093	1136.36	3.28321				10.7918	58.2182					3.13267	54.5995	1.56835	0.910694		8.69484	16.0767	54.4118		34.5275			0.3248		10.8538	4.08818	157.318	87.855				0.837922
BC4_8hpi_I_bio1	2021	633.127	818.848		119.027		1.17397			1.28714	59.0438	235.08	5.18499		38.3354	961.538		0.812409				101.66					1.2668		1.7561	7.05506		8.39476	47.5854	38.9023		130.088			1.46809		104.253	4.66371	54.6634	116.7				2.45752
BC4_8hpi_I_bio2	2021	166.804	709.693	120.162	142.593	633.812		411.703	4224.29		31.6066		12.7721	34.3602	190.08	1068.38	2.95634	3.13112	0.958927	56.7329	24.6662	4.94759	13.7536			6.87737	16.2872		5.51415			11.5249	0.950566	119.209	27.2388	16.73	103.663	6.61728	0.139218	9.7064	4.73467	11.645	336.928	9.21025	2.61581	0.888256	9.86734	2.43393	21.9688
BC4_8hpi_I_bio3	2021	235.276	2765.13	184.813	217.779	102.781	67.5177	711.902			77.2489		44.2792	149.605	1010.34	1237.62	61.9853		13.1664	503.311				366.675	33.614	120.139	42.8029	350.63	78.563	30.469	121.423	23.7775	12.2809	139.114	209.388	60.324	1664.38	1972.1	29.1376	1376.42	220.744	83.5905	202.853	844.019	107.078	36.2681	597.74	203.114	1679.41
BC4_24hpi_I_bio1	2021	272.891	793.759	182.604	154.397	731.301		481.78	4981.61	0.431602	43.7162	59.7632	6.58956	50.7802	296.52	1168.22	3.56355	3.3104	1.03585	119.927	23.6109	2.16605	23.9068	48.2717		3.20489	24.5604	22.7161	9.0678			39.3525		154.429	7.58954	25.7132	38.6883	10.1863		30.1081	17.2836	16.0822	451.761	25.4885	3.88797	1.44749	41.2291	3.68726	120.743
BC4_24hpi_I_bio2	2021	113.054	968.421	127.598	109.854	127.108	39.7937	188.48	9.68947					129.091	892.384	1213.59	54.4862	5.44381		440.27				699.372	6.89101	7.39842	55.5857		84.4706	19.037	109.906	99.8024	166.13	189.321	1124.53	51.5713	1579.17	614.508	101.781	43.9501	107.548	74.6147	333.076	239.186	137.727	20.108	233.49	212.366	497.86
BC4_24hpi_I_bio3	2021	1096.37	1613.43	1068.57	164.979	57.4671	2.93879	883.367	9892.41	2.64876	37.5611	227.751	21.9245	50.4771	308.506	1157.41	69.9249	1.09088	2.93905	279.972	50.7965		9.73431	148.706	13.5675	6.603	60.1054	42.4965	33.7254		2.51812	80.3865		60.7868	24.0698	140.787	297.526	56.4966		60.5243	76.0628	81.6375	104.44	72.143	5.3767	0.755223	160.524	6.5204	424.439
BC4_48hpi_I_bio1	2021	790.856	1222.42	863.809	327.067	167.473			8924.01	1.46764	63.9608		7.55903	57.9597	469.019	1168.22	77.1429	2.95559	2.64922	277.092	99.4472		7.70246	155.263		6.76866	19.5868	54.2323	18.6983	6.21418	3.61898	115.45	1.84642	43.0326		49.7529	139.749	42.0808		61.2744	39.1502	45.6838	61.355	111.725	6.95787	1.15052	59.8248	3.24935	88.2466
BC4_48hpi_I_bio2	2021	596.157	1086.06	668.88	99.0724	33.0977	1.31141	492.233	5863.04		51.6719	211.237	3.62546	51.0877	400.957	1024.59	62.1732	7.92045	2.28651	182.535	50.2175	3.21016	9.14296	75.8097	13.5172	6.49028	18.9584	45.5479	18.778	5.17653	3.20509	69.3781	0.671701	45.7016	18.59	86.0142	100.046	26.5024		58.8423		97.0311	84.7463	88.5431	6.13163	1.50403	19.9129	2.59924	66.2713
BC4_48hpi_I_bio3	2021	239.822	668.888	189.732	106.462	140.328		223.754		10.9934	41.0212	89.2623	22.5268	30.4773	155.198	1126.13	29.968	0.794055	0.701397	229.338			7.06849	110.792		44.2314	35.1925	117.287	11.8925	9.64598	3.94519	24.8495	6.37506	76.3257	184.651	315.612	217.951	65.3946	8.82812	233.78	16.591	34.0495	136.087	248.2	35.7751	11.0348	74.6601	122.405	222.629
BC4_96hpi_I_bio1	2021	653.443	1290.98	612.627	191.462	78.5084	135.393	609.171	7543.09	23.2962	50.9749	166.898	27.4061	75.1604	329.368	1136.36	51.6605	0.397609	2.4077	131.428	67.2798	4.59875	6.48888	50.8494	14.1436	7.07081	23.3837	55.8718	13.6491		2.52712	48.9945	1.01793	41.8733	3.86331	66.5758	70.7064	13.959	0.152173	73.3633	36.6558	31.4728	64.2794	83.7638	5.5604	2.0806	55.886	4.29208	119.859
BC4_96hpi_I_bio2	2021	522.678	537.011	662.729	245.931	138.759	1.44315		6242.46		140.569	71.6721	89.2609	53.2344	472.596	1086.96	50.2916	14.2276	1.71214	116.234	129.516	14.9688	11.4534	167.196		4.69958	18.6643	21.9231	18.0714		6.18104	49.2557	5.65741	55.1065		30.1216	300.541	50.7911		17.362	74.9444	37.795	90.5839	27.139	4.96673	3.17027	97.8113	3.29047	131.366
BC4_96hpi_I_bio3	2021	517.929	880.71	624.683	256.751	83.1946	140.876	468.765			15.2671		323.752	131.123	831.307	1157.41	74.8542		11.1083	610.346				551.216		74.2057	26.11		42.5633	33.0732	35.6554	20.7167	193.757	232.575	71.1233	2009.62	289.896	643.534	84.8481	971.875	72.1602	244.879	313.52	727.789	157.901	25.9411	314.908	332.293	834.967
BC4_0hpi_NI_bio1+2+3	2021	316.199	400.395	493.455	217.942	85.3054	154.844	354.587			131.608		28.2037	107.707	803.956	1250	99.404		5.62958	969.776			21.8737	253.655			55.612	130.566	9.32857	39.6683	63.2723	32.1255	30.6605	128.798	265.309	545.162	933.305	215.398		409.596		268.065	161.665	727.367	107.653	89.5537	144.663	188.036	392.865
BC4_8hpi_NI_bio1	2021	277.026	3230.06	214.84	174.336	243.491	63.251	297.282			8.13544		85.024	116.727	686.309	1201.92	69.2682			372.905				282.258	10.0424	32.8751	44.5487	138.714	39.718	23.1957	70.4778	77.8026	15.8072	123.754	60.3749	372.977	168.679	202.663	20.0372	227.636	12.3861	266.709	222.873	186.142	51.6143	13.6899	80.5374	74.6138	208.602
BC4_8hpi_NI_bio2	2021	148.39	736.179	188.08	116.376	83.485	41.9852	169.971			18.7705		75.8421	80.6254	557.155	1033.06		0.464929	7.94047	366.698			5.4643	120.928		5.80594	34.1284		32.1286	22.7772	19.7949	8.63725	94.3586	56.2084	96.3124	19.0583	208.959	47.2229		247.864		105.133	91.0308	215.385	19.8984	11.5076	47.1662	101.702	135.732
BC4_8hpi_NI_bio3	2021	325.043	1761.22	244.977	161.628	684.236		607.885	8338.88	94.5423	10.715	79.8123	95.6283	107.122	553.747	1190.48	77.1066	12.7943	2.75232	196.002		11.8595	28.1074	78.0179	5.65177	7.55369	30.8245	43.3125	32.5984	7.00191	18.6303	63.7296	6.59772	195.274	54.8865		209.864	56.5811		56.9833	8.90309	144.032	372.7	31.6535	16.8016	5.01056	25.923		46.5708
BC4_24hpi_NI_bio1	2021	175.982	1074.08	183.064	124.775	96.343	44.0081	295.813			49.5251		98.2273	53.7381	535.504	1179.25	25.1262	2.15399	2.01887	294.681		1.86537		254.053		77.816	75.1479	140.602	10.4311	13.5355	163.22	63.4664	54.0493	171.24	120.15	828.156	771.624	550.429	23.1386	551.106		87.1708	235.019	230.133	288.003	35.1267	181.802	206	421.906
BC4_24hpi_NI_bio2	2021	774.62	995.703	696.057	262.561	184.216	0.871171		7300.79		75.234		54.2601	1.76362	43.4401	1237.62	3.60485	0.212023			11.3553	79.5615	16.5726			6.6751	1.28191		1.69819			9.18593		52.6201		66.646			0.967172		13.1567	3.60518		48.6702			44.8777	1.1665
BC4_24hpi_NI_bio3	2021	489.118	1350.65	416.504	136.416	82.6962	77.7739	530.932	6371.49	129.19	60.063	172.233	24.5176	75.6273	337.018	1250	83.3183		2.51304	249.395			13.4391	75.67	17.8655	6.51578	42.3497	57.9691	15.2199		3.35739	116.019		42.5987	20.9518	47.1815	158.029	56.4284		66.4375	15.9332	44.6167	66.0559	65.5164		0.727138	39.6104	3.07521	106.42
BC4_48hpi_NI_bio1	2021	376.284	2009.69	202.258	141.333	264.66	2.06721	804.347	10026.4		30.1581	196.444	30.9882	45.4335	146.97	1237.62	22.7715	10.5264	1.99648	75.869	77.64	9.04657	7.92442	199.337	9.58333	11.602	34.309	35.0048	17.4199		3.58515	27.1237		44.5506	109.765	85.4632	836.12	201.167		41.9258	10.1225	27.0204	51.0851	63.8148	13.8312	1.13488	33.6709	3.93545	75.0773
BC4_48hpi_NI_bio2	2021	237.946	454.478	334.325	177.928	166.369		291.122			97.9821	116.168	24.1978	33.1437	176.362	1157.41	42.4076		1.66439	337.218	54.7449	22.7115	8.96559	128.59	15.2194	37.3986	38.8056	135.913	8.47853	29.9246	49.546	25.0821	29.7173	67.6059	351.625	509.422	1237.81	140.657	3.57024	281.691		95.9744	113.623	448.943	85.1514	23.4995	66.4401	63.3897	103.146
BC4_48hpi_NI_bio3	2021	312.041	567.369	285.707	129.937	227.611		300.966		67.164	51.3086	156.193	29.5304	56.2087	282.331	1250	50.0606		4.83605	329.777	29.2904	13.9488	9.71371	190.185	9.98765	10.1399	23.2028	52.2296	13.1505		18.9771	32.0973		67.9339		224.622	143.18	43.1268	1.16588	60.2776	10.807	86.6028	144.604	111.563	20.2311	13.5321	54.0022	38.489	126.705
BC4_96hpi_NI_bio1	2021	844.474	1691.07	920.271	276.849	166.101	1.79304	797.259	8859.12	9.89823	91.4001		30.9214	59.4588	368.155	1106.19	62.5695	0.642118	2.27253	188.007	80.7777		12.6848	135.881		5.01817	19.0316	35.1405	30.9859	2.93673	1.62559	51.3614		66.4635	18.3103	46.7498	153.547	33.3934		43.0351	34.1442	107.85	152.883	50.4908		0.467634	82.1134	2.34374	187.79
BC4_96hpi_NI_bio2	2021	616.936	4734.56	293.756	270.065	224.434	174.27	797.83	17738.9	17.4146	53.6437	138.319	21.618	82.0284	510.653	1225.49	60.4772		2.2712	407.896		41.6118	12.4357	182.519	49.9702	32.7752	32.4849	321.588	29.0796	23.4793	84.3565	59.9431	15.056	60.3442	87.821	289.429	240.43	1541.38		648.77	10.1278	94.2512	85.8038	546.491	35.6703	7.4517	54.16	30.0925	176.571
BC4_96hpi_NI_bio3	2021	210.105	224.204	458.708		92.831		208.153		380.976	97.5923	109.591	48.718	90.5344	596.695	1068.38	100.568		22.9862	784.604	65.4738		17.426	158.814	9.74993	46.1325	36.672	117.465	13.8268		14.6866	44.2724	4.89167	58.8632	53.8954	363.311	139.066	84.7641	6.20209	257.876	28.1354	174.413	101.997	511.119	44.1146	7.97546	142.27	98.5852	471.277
Kish_0hpi_I_bio1+2+3	2021	818.926	1089.85	969.982	168.597	47.5675	1.09337	673.955	7106.33	0.62776	71.9867		25.9416		37.9819	1000	3.12136	0.170304			10.9263	100.492	25.5748			6.80087	2.79585	58.5509	35.6446			10.5043				67.2368					16.9077	1.66696		77.3446	3.62679		52.8882
Kish_24hpi_I_bio1	2021	266.372	266.74		194.714	117.493	2.41696	434.455	5128.13		72.1615	121.61	61.8618	2.37862	35.5803	1190.48	3.37285				13.6616	69.6352	45.0208			9.6246	3.27409		32.8497	1.46512		18.8038		58.9978		75.3403	59.0739				68.2185	10.3618		90.8021			157.549	2.40845
Kish_24hpi_I_bio2	2021	653.223	1386.08		229.582	143.503	1.17459	670.532	7436.73		55.7503		4.63779	1.28296	48.9515	1250	3.50835	0.1701			10.9434	104.101	35.3936			11.102	4.70185	109.664	24.5395			9.03113		49.7623		59.3663					15.4424	2.51531		191.935			62.335
Kish_24hpi_I_bio3	2021	555.745	2431.09		242.686	142.342			8332.12	0.606623	55.9697	98.2134	9.05981		44.9394	1136.36	3.09401				17.3579	108.483		167.917	0.639634		6.66177	122.13	33.2561			9.27121	0.972355	50.804		81.8021			0.226357		76.2732	5.56066		215.396		1.65485	167.702	2.66268	311.835
Kish_48hpi_I_bio1	2021	1153.75	1496.05	1009.86	298.483	97.8298	388.809		13206.8		110.97		50.1232	12.5014	77.5287	1096.49		1.67052			12.4475	32.4501	66.5864			19.7165	1.9726		38.5553	4.15265	4.0564	27.0312	2.96024	77.4785		785.225			2.61298	90.4094	53.1866	7.98851	148.496	77.7869		1.04318	109.796	16.3145
Kish_48hpi_I_bio2	2021	140.382	314.588		123.05	77.0683	1.21726	345.591	4277.2		83.9349	82.2495	32.2114	2.30226	35.6694	1126.13	3.27447				15.8398	81.7056	48.0103			12.5311	6.07376	107.125	28.3279	2.85353		10.8171		56.9032		89.1267			0.396754		55.2755	10.9345	108.615	228.081			176.759	3.01215
Kish_48hpi_I_bio3	2021	526.174	911.943	540.549	118.334		274.77	540.122	7234.4	51.7001	62.7274	770.375	19.0978	57.3071	265.07	892.857	59.8659		2.9995	244.664	30.6812	10.4723	15.6834	159.512	10.8698	31.4819	9.43362	55.5056	8.69104	18.2164	10.6108	24.6556	3.07592	32.8123		948.122	60.5587	135.381	0.774038	81.2755	32.2001	57.4406	45.7697	74.5201	5.52908	5.81521	73.0191	22.3277	129.538
Kish_0hpi_NI_bio1+2+3	2021	449.216	1196.84	585.255	306.741	182.869		1045.57	15458.3		9.61564	206.441	41.5077	78.6077	482.983	1237.62	134.758	21.4118	3.27758	297.166	82.4566	29.2197	38.504	699.293		17.6621	18.8345	213.183	58.4034		9.77827	15.2397	5.67751	62.8546	13.8649	347.777	698.748	299.726	1.45071	390.768	50.8701	158.872	90.1611	227.742	15.8556	10.0596	158.906	26.5794	222.2
Kish_24hpi_NI_bio1	2021	822.393	3342.31	727.326	240.551	119.834	168.498	1130.37	14544.2		89.9503	215.018	43.5839	125.069	457.225	1077.59	118.087			293.496	114.467	3.41631	14.1205	575.361	23.365	18.5065	15.581	155.223	16.8404	10.99	2.87281	10.1748	3.12895	61.4641	10.8158	179.72	149.477	290.745	5.04659	232.047	60.2164	142.54	87.7076	158.454	14.6157	9.4774	165.96	20.348	215.386
Kish_24hpi_NI_bio2	2021	371.818	2690.52	402.564	228.301	136.764		825.045	10097.7	1.04442	3.90089	233.397	47.1148	53.5453	501.899	1225.49	56.8402	3.57381	4.38552	241.59	59.0443	7.50508	18.4487	394.664		12.4993	15.9924	176.062	3.49347		3.59254	9.73508		45.9953	28.3292	246.205	243.005	100.804	0.476845	251.631	14.8299	95.026	56.5018	120.723	16.1025	8.40977	84.4735	19.0028	103.174
Kish_24hpi_NI_bio3	2021	263.12	308.798	168.049	60.274	154.903	0.519525	106.466		101.8	36.963	98.1907	8.32394	19.3233	111.473	1096.49	23.8249		1.72698	225.988	18.7748		4.04259	47.5128	6.39563	4.89082	17.5035	23.2719	5.52821	4.39804	12.5669	28.4542		33.2553	37.7781	73.6426	64.7603	24.8455		20.7224	6.34931	17.9366	84.7636	42.1352	3.21356	9.95832	15.7981	11.9532	32.8382
Kish_48hpi_NI_bio1	2021	304.941	313.966	760.688	108.95	27.0844		484.38	7329.89	0.92637	3.84397	521.061	64.4158	51.3579	405.371	1077.59	121.028	8.9631	2.55575	235.959	43.6174	9.77057	32.7828	239.062	12.7127	17.5911	13.7779	81.3879	21.677		7.53695	18.4777	2.85905	42.3302	8.17743	1304.56	144.286	171.721	5.66835	127.147	7.8478	90.6175	76.1142	79.2552	12.2649	7.19206	43.6587	20.3625	58.322
Kish_48hpi_NI_bio2	2021	840.622	2037.18	744.384	205.757	91.2936	436.065	934.803	11405.8	373.508	122.701	851.585	47.4782	114.826	699.465	886.525	92.3279		4.47405	512.912	46.9449	9.85844	30.413	308.772	23.7889	26.4908	18.0944	133.747	17.6518	36.4652	11.0468	29.3401	3.67189	58.7192	11.9692	813.244	125.535	144.207	0.509682	179.586	12.7291	180.981	75.2913	146.685	5.37979	7.7779	44.9487	26.5953	59.5809
Kish_48hpi_NI_bio3	2021	308.254	1738.29	307.915	168.905	95.3603		602.578	7394.8	6.09759	3.91616	373.029	21.5555	75.0391	510.596	1146.79	102.853	2.73909	4.81801	455.71	55.1625		25.4197	322.391	43.44	21.8827	17.7652	270.208	3.31657		9.17809	43.4196		38.239	65.1002	412.434	189.243	151.271	1.01669	465.688	101.174	76.9214	54.3995	196.457	2.28239	7.31874	207.317	24.3208	288.79
Terold_0hpi_I_bio1+2+3	2021	275.372	605.045	326.879	189.865	158.474		381.804		371.181	66.0065	146.116	49.4274	249.611	1804.99	1250	71.4452	3.34766	25.2703	656.445			26.5996	184.094	5.70135	86.8466	37.774	196.882		68.545	22.1419	35.895	12.9775	81.7414	99.12	1867.73	102.911	93.6881	42.8212	846.042	116.3	103.794	210.031	602.338	98.6585	13.0905	157.637	465.606	627.273
Terold_8hpi_I_bio1	2021	625.951	3155.63	605.981	127.88	46.0567		829.682	11717.7		3.51388		66.784	153.035	976.105	1213.59	246.567	1.63645	9.69004	691.69	41.6307		88.3619	390.734	58.377	40.5575	24.4383	349.488	22.1155		18.9627	54.0625		73.0263	345.85	1011.39	694.016	589.085	7.20029	555.252	24.429	319.526	88.6188	395.932	12.8419	63.0611	128.846	45.3714	125.822
Terold_8hpi_I_bio2	2021	386.023	2829.56	299.237	169.119	78.7185	173.606	800.39	10702.8	22.8419	74.9174	419.125	151.879	159.135	783.651	1106.19	130.849		5.48401	443.298	92.7313		44.6983	178.522	36.679	28.4363	26.2051	281.604	22.2507	2.03085	10.6226	26.42	1.73247	55.7135	495.238	636.904	1297.02	772.063	1.43589	449.101	46.2632	132.963	70.5762	199.038	26.7548	21.8314	171.688	25.1905	216.49
Terold_8hpi_I_bio3	2021	550.012	1813.57	533.187	267.365	424.437		777.482	9138.74		76.0573		16.7911	94.8964	503.118	992.063	81.3268	1.4044	3.25334	237.456	24.0358		60.4135	97.987		10.7778	18.4114	95.3583	38.4856		4.18098	42.0139		102.831		83.7	189.704	120.881	0.293927	140.642		324.639	330.688	93.5898	3.22835	8.36716	68.3027	5.42568	250.968
Terold_24hpi_I_bio1	2021	319.449	1320.98	352.692	132.835	66.6256		484.22	7039.29		3.85302	632.633	19.9962	85.1206	543.911	1041.67	373.387	1.167	6.14325	1010.33	61.8799		40.9955	362.334		16.7006	18.4419	149.083	27.7585		12.7496	108.996	2.2998	32.2622	68.5103	654.096	632.248	218.297	1.28902	215.932	12.3569	42.7922	42.3174	158.216	16.5015	17.0921	56.5634	27.0679	89.8689
Terold_24hpi_I_bio2	2021	569.577	1332.98	559.49	189.877	68.1812	127.921	460.602	11215		90.0651	1654.13	99.0988	174.268	950.576	1106.19	583.215		7.92106	1408.09	87.6894	11.231	120.984	548.862	27.9736	35.1311	29.7642	124.643	18.7013	100.535	56.0696	173.012	4.12101	57.0146	92.407	2705.34	1052.38	618.79	2.20686	205.987	48.6767	202.016	70.771	180.496	25.9938	24.6358	170.801	47.3219	375.105
Terold_24hpi_I_bio3	2021	305.334	1196.58	163.691	124.745	81.4515	71.8548	705.135	10183.4	30.5895	37.4315	146.961	51.7174	64.3272	286.264	1179.25	122.215	0.566584	8.41168	435.783	73.3783	5.79748	306.982	135.742	12.7344	11.3168	26.4151	39.859	2.02018	12.027	5.27216	91.2803	0.740838	23.3964	43.924	126.503	657.956	233.658		54.0675	13.5011	50.0128	37.6609	56.3333	11.6395	34.7569	43.4813	5.17023	113.346
Terold_48hpi_I_bio1	2021	345.059	3480	383.5	241.503	140.537	1.75758	855.083	10421.2	0.528858	3.38496		46.6691	155.869	1021.98	1146.79	130.387	1.1563	6.28464	528.969	57.2712		32.1526	294.351		17.5671	20.6587	259.927	37.7265		6.13105	31.8328		55.6373	100.042	178.466	436.806	506.05	0.397815	343.492	71.2061	61.7706	78.5852	143.602	14.5744	11.2363	148.697	17.1094	168.689
Terold_48hpi_I_bio2	2021	512.35	3070.52	458.477	226.61	125.022		761.407	10038.9		3.17769	465.784	28.5139	133.652	851.4	1106.19	173.136		6.2496	615.064	43.1655		20.6766	267.036		19.1771	21.9619	255.75	37.7138	15.4246	8.88825	49.2289	1.99301	55.8717	93.0915	495.195	479.58	406.288	1.27432	407.235	23.376	289.132	82.9408	205.723	13.0704	10.732	136.824	24.039	259.48
Terold_48hpi_I_bio3	2021	176.375	905.354	168.369	189.082	246.993	50.3511	365.641			94.4586		47.1621	51.2666	320.341	1179.25	21.9012			196.203				137.032			20.8406	101.293	23.8147	18.9291	10.4873	21.3574	7.61695	124.39	214.325	709.854	302.134	76.8347	3.48504	230.795	74.2562	122.442	181.339	201.475	84.9485	17.2848	330.116	101.807	1091.42
Terold_96hpi_I_bio1	2021	216.333	419.051	385.275	185.378	101.477		655.506	9393.13		4.91207	350.381	55.111	142.949	898.577	1068.38	234.027	1.53979	5.31359	765.89	75.3399		118.106	323.696		23.2219	24.4746	202.682	42.0272	24.6621	13.4626	67.7615	1.66977	56.3408	195.612	489.094	1327.47	553.167	1.1371	272.901		311.207	68.4742	206.143	16.968	20.0489	112.22	25.2891	139.073
Terold_96hpi_I_bio2	2021	433.308	2700.75	371.439	286.145	178.524		1090.51	13921.5		7.37383	275.989	25.8476	152.01	938.214	1116.07	188.387	1.99718	5.43097	649.482	38.177		145.843	510.486	41.8113	21.8392	24.5434	263.818	40.1566	12.8421	7.13121	41.6339	2.43505	63.8825	102	289.628	622.051	313.791	0.4127	411.533	98.9767	271.622	87.6336	189.837	6.05055	23.155	291.355	24.1098	418.779
Terold_96hpi_I_bio3	2021	585.54	2001.85	455.949	325.88	322.312		1204.32	15177.2			105.896	38.8434	114.657	642.543	1126.13	110.15	5.05741	3.22832	317.147	28.6049	3.55566	110.434	155.973		11.9127	25.99	76.8648	46.5907	9.02621	5.46418	55.6432		82.5761	93.627	111.469	915.158	336.278	0.408155	116.264	24.3258	202.178	193.931	86.1155	27.2513	13.291	81.072	7.64331	152.454
Terold_0hpi_NI_bio1+2+3	2021	586.741	1392.57	458.237	216.646	317.274		585.059	6897.97		67.9449	63.9996		138.081	694.167	1157.41	105.71	1.78603	7.63043	312.105	25.2649		49.6599	77.7453		8.27963	15.4342	43.1027	27.8663		4.41337	70.5969		82.8707		41.0376	195.631	126.538	0.155478	47.6086	10.9524	245.127	279.807	47.7887	7.06767	29.7652	35.4065	5.87561	94.8472
Terold_8hpi_NI_bio1	2021	915.565	2421.09	647.147	317.382	233.852		924.591	12057.2		118.024		16.2703	198.011	1032.66	905.797	145.522	3.02315	2.68487	475.998	47.7927		65.2213	185.012		9.35536	23.1751	78.7681	47.2558		6.39888	76.4837		79.3116	54.2121	125.818	629.015	438.179	0.282308	134.955	41.2016	506.243	271.573	115.138	6.55938	14.4374	186.819	14.93	525.932
Terold_8hpi_NI_bio2	2021	305.545	1110.17	247.005	125.997	127.877		413.42	6051.06	1.16684			14.7312	43.7758	258.975	1201.92	56.2172	0.550601	2.46202	280.623	49.5625		16.2976	84.4368		11.8156	19.7057	57.4818			5.11753	48.3548		34.0818	74.3898	153.529	415.996	374.761	0.221767	102.691	80.0557	37.652	93.5668	87.9486	6.67406	9.08019	159.848	13.3823	336.761
Terold_8hpi_NI_bio3	2021	748.661	2057.19	560.656	261.621	252.759		757.501	9804.24	0.630943				99.7623	551.804	1146.79	82.9285	1.61538	3.23334	390.813	37.28	3.26359	64.3645	135.174		10.439	21.9221	121.996	34.7343		5.06616	65.3711		69.8077	77.3595	137.038	432.841	136.644	0.134035	229.422	78.843	307.631	194.968	186.969	2.95597	10.799	176.251	9.22596	316.143
Terold_24hpi_NI_bio1	2021	406.037	833.843	457.383	172.178	207.753		505.955	6281.08		91.636	103.988	12.1222	60.3156	316.265	1213.59	76.5717	7.68951	2.91441	281.039	32.3426	4.39597	51.6896	103.479		10.9741	20.1133	83.6617	22.7194		5.55868	58.045		55.014	38.6543	116.004	248.813	168.137	0.318459	132.955	12.2481	210.293	182.839	120.837	2.21973	11.2163	48.8251	6.36006	157.635
Terold_24hpi_NI_bio2	2021	531.664	1733.68	363.15	267.719	476.126	1.74657	658.301	8295.61	36.4477	71.1453	109.085	13.6932	52.9063	251.784	1179.25	60.1174	2.18298	3.54077	250.08	28.1326		74.118	77.1973	23.1438	9.34515	14.8106	74.0182	22.1882		3.52488	44.2568		82.2207		62.417	273.528	176.269	0.250506	95.1927	29.6416	149.496	206.217	103.787	2.4979	10.4775	84.633	7.58588	216.588
Terold_24hpi_NI_bio3	2021	572.023	1456.13	469.931	160.635	154.148		489.393	7201.82	0.763397	67.7288	186.866	14.6067	86.3894	530.933	1213.59	88.1835	3.30381	2.53747	477.047	30.0703		25.5937	153.775	15.4859	6.221	21.7063	53.2198	22.5609		3.61854	78.0882		37.0587	89.8252	222.616	415.448	127.138	0.112441	88.6225	46.7439	85.4685	109.746	75.7772	6.71409	13.7255	96.268	13.5509	160.124
Terold_48hpi_NI_bio1	2021	566.38	1375.8	519.523	196.091	287.848		545.973	6704.4	0.947802	67.5194		22.7032	117.069	642.714	1179.25	109.025	0.507876	4.65537	399.206	27.4832		46.3022	173.357		5.56197	20.4323	43.1619	24.7639	6.03996	3.31223	111.871		75.6968	17.4897	48.7718	252.053	122.589		51.5268	24.6511	211.024	253.303	54.7971	5.56724	13.8313	87.5343	6.60432	283.805
Terold_48hpi_NI_bio2	2021	990.799	2147.56	692.182	313.677	212.275		1170.63	16097.4				5.5662	168.127	1045.03	1146.79	100.564	9.10141	9.0147	473.746	37.6209	4.54938	116.168	188.049	20.6743	11.2684	28.2706	72.9899	46.9982	17.893	9.4662	89.7853	2.22209	59.2626	19.5013	257.802	648.557	249.525		95.9049	28.8118	473.597	105.693	126.692	10.4343	22.7997	63.0261	9.95315	97.6614
Terold_48hpi_NI_bio3	2021	688.456	2684.26	441.142	278.482	259.811		1246.6	15456		70.6495	83.6616	9.42564	245.261	992.323	1050.42	150.39		15.8223	505.52	37.4341		229.836	170.877	26.8315	8.71508	29.2616	122.617	38.1099		8.40756	103.116		89.0522	25.6525	108.405	766.665	399.771		255.574	52.1486	302.688	197.509	184.065	2.20107	37.2376	120.399	8.94494	204.251
Terold_96hpi_NI_bio1	2021	539.201	1188.1	535.638	100.565	66.4914		570.914	7887.72	0.629259	2.21943		23.188	159.369	896.797	968.992	102.327	14.5068	13.346	419.472	41.1895	7.13951	114.057	162.059		9.4831	29.7954	64.9058	32.825	11.0244	8.01267	76.5999	1.55427	49.5125	11.233	213.234	620.829	184.458	0.115247	106.349	102.051	931.59	143.881	113.912	17.9948	25.4016	245.883	8.51879	480.854
Terold_96hpi_NI_bio2	2021	944.774	1866.3	849.663	117.664	63.3843	1.60771	569.34	7283.43		98.2311	199.037	7.75648	187.804	1009.64	880.282	103.247	1.22597	2.58974	373.778	23.7688		19.3489	156.981		11.6911	22.6991	82.5665	31.4135	13.721	7.66769	83.3115	1.22841	76.268	14.6721	190.431	396.03	194.513		113.506		1968.86	197.461	130.874	13.6026	10.2377	79.9879	6.36411	157.892
Terold_96hpi_NI_bio3	2021	470.692	1470.52	369.817	170.778	247.383		483.846	6383.12		65.2217	245.803	13.533	132.791	622.764	1086.96	118.731	0.436175	2.68377	390.479	23.8114		22.6143	131.337	25.7145	11.5109	26.607	99.3389	27.2011		6.68401	90.8799		71.4127	37.8721	333.831	391.409	140.362		213.441	89.8186	168.035	228.488	135.279	2.99724	2.66411	210.162	9.62114	394.156
Bianca_0hpi_I_bio1+2+3	2021	307.137	5446.63	291.239	245.955	438.231		686.471	8784.55		59.6219	191.97	153.417	199.456	851.651	1146.79	132.882	23.1261	3.32741	213.271	116.169	14.6788	23.2003	248.69	37.525	17.8781	80.6067	243.417	11.7141	4.53249	10.8347	69.9601	6.37842	145.799	1828.93	352.5	2726.79	691.706	1.00175	527.488		246.032	298.039	215.522	25.1063	8.98137	43.3292	13.7478	88.0019
Bianca_8hpi_I_bio1	2021	375.503	4579.55	377.613	266.895	1176.69		825.441	8640.99	1.15022		110.839	74.7753	152.203	707.398	1050.42	132.484	11.3105	3.27008	258.525	62.3443	10.0163	52.12	335.327		13.4727	34.6797	154.994	14.0113	1.9935	6.81509	47.7732	27.1273	267.128	40.2739	103.024	141.951	261.804	0.247681	211.782	8.99683	198.203	668.716	120.893	28.6039	9.19033	31.9348	7.18776	96.0678
Bianca_8hpi_I_bio2	2021	302.167	2628.41	262.071	176.077	306.454		723.245	9455.29	0.49444	56.0517	135.523	79.8974	61.5731	280.963	1050.42	111.876	21.2868	2.99818	231.426	74.2557	33.1646	14.6433	241.818		12.1793	40.8911	87.931		5.67703	28.4274	47.8236	64.594	77.8861	93.3354	253.251	1106.43	447.528	2.67129	187.699	8.64278	147.355	205.783	109.531	22.442	9.16523	31.0261	11.9351	94.6864
Bianca_8hpi_I_bio3	2021	160.493	4404.33	116.789	150.345	260.733		492.082	6926.66	0.385799			102.427	60.205	305.986	1168.22	69.4045	5.78185	2.51616	147.984	225.244	8.31057	13.0641	181.557	19.3112	25.5019	40.7259	124.272	9.7415	1.66053	3.62362	28.4132	9.62897	62.579	1105.75	114.603	1310.59	621.296	0.360228	270.941	118.388	43.6406	158.775	104.779	31.8031	4.30338	233.729	11.5795	392.16
Bianca_24hpi_I_bio1	2021	220.65	882.899	224.643	124.172	66.6179	9.35517	482.994	7805.44		62.0015	226.404	52.1939	53.9451	285.611	992.063	146.341	27.676	2.83379	300.209	63.339	29.3783	4.79965	257.818	11.2394	12.5116	71.5932	69.8722		7.21299	12.9744	76.2136	3.9442	22.3149	170.713	815.016	1297.78	585.363	6.23587	164.13	26.9477	58.7409	58.834	143.679	43.443	14.5541	457.516	33.1989	1387.87
Bianca_24hpi_I_bio2	2021	271.811	612.729	544.344	277.587	157.764	163.504	450.452			4.21057	8.05631	39.9642	165.334	1187.5	1225.49	124.608		83.3502	1172.75				326.736			54.8442	445.498	153.253	70.0307	182.24	115.329	349.14	127.183	223.074	80.0147	804.741	4115.03	96.09	2442.18	51.8314	330.487	144.577	1814.02	159.16	38.978	452.281	339.674	2161.62
Bianca_24hpi_I_bio3	2021	304.074	2173.67	195.871	147.611	612.218	27.1876	527.139		310.278	32.8003	114.605	78.3637	97.3025	404.667	1116.07	85.7025	0.199599	2.12181	196.75	47.4355	2.69104	22.3569	104.116	6.99775	6.37856	49.1055	33.3836	23.1037	3.3707	3.23117	59.0292	0.957561	148.167	10.3493	102.235	186.759	228.317	0.264674	41.638	54.6062	125.258	424.412	27.9176	9.85496	4.37981	136.938	4.41136	258.753
Bianca_48hpi_I_bio1	2021	188.267	2975.16	188.542	122.352	250.496		370.496	5179.67			166.638	72.5398	68.8161	340.914	1237.62	87.2851	6.73403	3.62196	195.735	92.0904	5.15523	13.9951	166.476	16.8978	29.9637	37.4984	100.736	6.32759	2.06526	5.79203	41.357	7.88185	60.8633	696.558	205.008	1058.24	336.715	1.10779	163.153	8.10642	65.2887	144.045	86.7335	14.7824	5.39751	41.4597	10.6954	110.528
Bianca_48hpi_I_bio2	2021	303.837	1476.37	277.388	129.406	255.656		389.727	5348.03		33.5305	317.244	66.6524	62.0649	271.95	1201.92	110.74	20.6367	2.98511	167.584	42.9007	20.0386	17.0375	202.584		13.2502	51.6477	61.0996	4.56562	5.09891	26.4805	56.2676	1.22625	68.2113	70.4822	517.879	306.642	270.63	0.785879	67.8843	12.9998	135.777	194.402	53.3246	19.9784	5.38827	47.1358	9.67875	170.004
Bianca_48hpi_I_bio3	2021	144.553	2897.34	128.576	121.185	219.638		448.504	5976.76		45.3292		76.8259	76.2263	373.917	1157.41	78.6416	3.07993	2.63708	218.193	149.208	5.93927	18.0642	209.003		13.6751	41.0405	96.4093			4.13349	36.1325	1.06238	56.2356	370.489	71.9695	1298.22	454.033	0.214937	139.066	10.5758	41.621	155.994	66.8443	11.7987	3.31438	56.5864	3.92996	224.906
Bianca_96hpi_I_bio1	2021	290.577	519.319	361.879	186.961	131.025	124.957	319.304			86.6068		23.8268	154.881	1107.88	1146.79	55.0187	0.78795	11.5702	540.17				147.853		145.536	43.0184	236.692		41.3869	36.5767	19.2308	13.6763	94.6271	150.645	32.9526	377.49	326.726	29.4969	700.258	96.6487	220.655	136.879	706.471	107.396	17.9074	122.034	128.349	209.568
Bianca_96hpi_I_bio2	2021	199.436	865.537	228.856	119.647	195.714		469.736	6612.04		80.879	294.081	74.3977	68.0887	340.821	1068.38	122.546	30.1711	2.87303	192.427	75.2547	34.3899	19.5111	209.865		23.9589	59.6112	69.6387	31.4054	8.07344	36.1166	85.3378	67.5236	71.5695	69.0353	699.81	976.365	1028.08	1.62343	106.327	23.1955	170.554	256.038	54.3515	37.228	9.36459	84.4685	11.3712	280.012
Bianca_96hpi_I_bio3	2021	411.714	4418.08	312.385	221.567	433.845	77.0822	478.722	8823.8	0.490896	11.682	3.71241	11.5184	192.893	813.177	1146.79	156.584		6.67788	316.117	121.317			311.934		18.3025	58.6283	233.831	37.8221	19.7617	112.639	66.5192	14.3379	136.317	86.3609	44.6092	868.339	435.177	0.356657	598.895	24.5456	451.962	571.583	209.044	65.866	7.94754	138.208	12.1459	444.433
Bianca_0hpi_NI_bio1+2+3	2021	323.451	6085.57	356.777	203.824	604.467		575.971	6849.68		64.7973	150.02	134.458	236.398	1030.66	1157.41	104.618	21.1533	2.32672	264.319	43.1866	49.0234	42.7985	109.459		101.892	50.0442	187.11	11.1191	2.66846	10.2873	67.8689	49.7904	179.566	231.862	193.865	683.356	337.379	0.239684	348.085		697.607	428.749	162.608	33.9587	8.84118	47.0261	14.2674	144.211
Bianca_8hpi_NI_bio1	2021	185.492	2564.63	138.324	116.99	167.741	1.37391	347.555	4970.01	1.044	37.8593		91.9037	49.7901	240.748	1213.59	51.4838	1.63708	2.41427	215.247	236.246	3.28097	6.61518	209.969		12.6662	42.6123	70.3714	4.93732	6.46119	3.53754	32.0989	1.74892	40.6918	542.088	82.1221	1533	494.153	0.284518	103.569	10.8402	40.4911	86.8127	70.4088	20.8959	9.65887	35.2057	6.38718	100.613
Bianca_8hpi_NI_bio2	2021	141	2209.35	94.6978	101.924	109.053		411.422	7326.4		2.04757	78.8405	186.809	44.8277	222.66	1179.25	67.1879	1.16063	2.72312	260.125	126.969		4.77099	174.727	13.3019	14.4912	53.0293	73.9493		6.21064	3.18225	61.9343		40.1498	1751.14	151.192	2883.19	1276.97	0.677962	171.006		37.5978	71.3564	85.5356	30.587	5.94428	361.573	39.964	627.2
Bianca_8hpi_NI_bio3	2021	121.238	113.828	262.849		23.8396	34.7068	79.1882		59.3225	73.5224	294.227	40.3852	27.3523	187.028	1225.49	69.4044		3.03505	364.004	52.2961			144.484	7.06851	18.4745	67.7253	56.1152	5.44098	21.3619	10.2655	102.013	3.09889	18.4983	173.834	1362.02	1549.97	771.244		87.6229		52.7846	71.8461	106.894		22.6425	282.991	45.5871	748.72
Bianca_24hpi_NI_bio1	2021	497.529	1370.72	411.489	148.071	329.846	2.61071	357.325			62.5068	182.889	80.0728	82.1742	417.583	1146.79	97.5021		2.81969	326.186	36.6977		10.8779	169.52	9.20502	10.8923	62.6895	37.6728	9.65535	9.67164	4.53441	93.593		99.7741	55.4648	233.083	1016.13	613.636	1.10393	59.241		90.5413	287.397	101.277	31.4115	4.47103	423.165	25.8541	804.092
Bianca_24hpi_NI_bio2	2021	274.241	1653.23	190.216	118.647	122.791		445.34	7374.09		37.9245	84.0745	56.3471	40.6767	243.245	1250	66.9471	4.91303	2.22014	246.186	85.3177	11.1023	3.62257	406.686	17.6088	16.1837	46.988	95.9528		7.32129	4.27967	46.6931	22.6735	35.3243	140.082	137.73	808.122	202.822	0.554637	182.735	12.8697	103.718	76.3299	141.718	16.8553	4.44142	72.8695	9.96761	276.615
Bianca_24hpi_NI_bio3	2021	151.336	1173.66	202.21	84.6767	56.3143		143.851			21.2086	300.251	95.4054	60.9974	421.627	1157.41	80.7252		2.16615	498.83	32.1033			219.115	7.63421	17.6275	42.3128	93.1108	8.91557	22.6213	13.9965	73.3174	5.58756	26.2138	140.341	1384.94	495.993	387.04	5.17796	250.999	33.717	92.3089	86.0166	142.591	17.5888	3.54902	152.432	46.0338	379.569
Bianca_48hpi_NI_bio1	2021	323.075	2597.39	320.637	216.226	292.474		495.767	7838.13	85.3754		218.596	86.5961	182.323	989.989	954.198	80.7736	1.65077	1.73467	305.098	29.9825		15.7769	102.799	8.60129	10.9426	43.5924	67.3656	23.6362		7.01419	68.5365	2.27268	97.4674	100.993	494.989	419.812	753.086	1.3615	116.973	149.777	612.83	221.71	73.6609	30.8943	4.1388	398.115	16.9407	899.972
Bianca_48hpi_NI_bio2	2021	414.805	1372.64	384.779	173.171	376.396	1.68254	391.521		359.64	44.6132	318.202	210.701	66.0173	302.217	1225.49	77.454	7.40042	2.50885	230.138	30.721	5.37369	10.7353	118.911	9.16088	12.2962	38.3822	52.1802	9.40127		6.66149	66.2717	14.062	78.4618	34.9057	559.251	157.144	194.159	0.428579	66.1129		325.63	241.198	60.6364	15.6577	3.58405	66.0867	9.78811	204.461
Bianca_48hpi_NI_bio3	2021	192.394	1791.54	191.667	120.989	735.322		509.34		283.848		72.4031	215.027	103.949	448.725	1190.48	54.9385	2.43398		145.374		4.35601	21.5543	98.7817	4.07177		37.6738	35.2284	36.5683	4.05024	43.524	61.5775	30.3786	224.357	59.2334		288.242	602.414		38.9457		191.796	434.338	25.4817	8.87101	2.07202	16.7625	2.13547	20.5648
Bianca_96hpi_NI_bio1	2021	175.418	662.262	218.18	119.981	288.725		277.41	4256.88			115.523	33.7928	84.9393	473.435	1213.59	70.26	1.73221	2.09091	289.306	83.3388		12.8198	145.914		11.8174	44.2709	68.7944	9.34147	7.34062	4.2472	72.1327	15.5871	74.5035	175.717	197.167	677.926	424.11	0.185507	110.108	139.843	277.296	220.949	79.625	21.5143	3.49277	310.913	11.8513	455.658
Bianca_96hpi_NI_bio2	2021	599.28	2511.24	559.595	227.193	342.773	2.41725	450.927		15.2305	57.3531	193.465	28.8819	103.423	584.399	1201.92	109.077	2.5248	1.99272	457.182	36.5285		16.7228	248.653	12.4622	13.1793	54.2377	71.7778	22.1881		9.17707	100.55		93.9272	73.5634	559.601	588.092	364.501		129.008	108.24	239.934	259.033	136.425	33.6526	3.87958	388.056	19.1141	905.275
Bianca_96hpi_NI_bio3	2021	357.873	5405.43	526.464	177.038	244.496	1.65378	450.4		18.8432	50.0672	142.795	100.163	175.948	999.384	1116.07	72.5237		2.21997	422.487	68.6478		16.4241	216.438	17.9367	16.0003	75.3898	138.788	8.34022		12.6309	50.5436	15.0569	85.7596	326.988	373.159	705.593	611.957		303.216	110.66	281.207	129.413	225.499	49.1651	4.44908	363.537	36.4548	1139.58
F26P92_0hpi_I_bio1+2+3	2021	323.842	1651.77	300.525	253.121	443.032		442.561		2.43264	51.5821	94.9114	17.059	56.7869	465.092	1136.36	77.0209	4.935	2.86361	409.737	75.322	17.8989	23.5504	157.134	27.8172	27.5096	35.5543	208.797		16.4176	9.00409	51.7439	19.0092	127.847	652.11	523.171	744.379	1260.36	4.78488	573.732	4.96772	138.598	277.141	413.37	111.271	35.9223	132.939	71.8447	444.368
F26P92_24hpi_I_bio1	2021	159.248	2752.65	103.915	105.418	194.871		572.19	9694.46	15.936		30.525	22.6998	40.294	223.081	1126.13	54.5108	36.9405		130.615		35.0897	7.73103	78.3047	15.4678	26.4673	27.7308	172.766	31.9332	5.80568	53.9633	21.6028	2.92326	54.5503	114.088	10.9757	705.065	796.95		294.926	13.8798	61.5355	93.9785	103.837	24.2054	8.00707	33.8107	3.17134	58.7543
F26P92_24hpi_I_bio2	2021	243.161	2401.98	258.467	157.319	132.821		454.899	8842		48.8614	94.5795	44.6251	78.6216	476.976	1179.25	72.414	5.04601	2.43427	299.542	103.846	2.7868	16.8065	150.61		16.4162	38.3849	140.879			7.7695	40.3214	1.17033	51.3356	49.2881	137.508	441.131	927.973		210.448	59.3459	61.1651	76.5193	134.742	34.3089	8.19468	113.032	12.9508	158.293
F26P92_24hpi_I_bio3	2021	293.527	770.648	284.818	151.952	132.561		711.055	10350		80.7108	204.367	46.1312	82.4702	386.93	1041.67	157.071	3.20498	2.30041	283.217	49.0945	8.99253	10.7421	147.733	9.68495	10.52	34.3835	51.8122	23.7399	13.6669	6.76645	107.471		53.1472	26.3643	326.632	870.078	836.826	1.02845	55.1356		119.191	125.279	71.959	17.5935	5.34794	353.689	20.4292	578.814
F26P92_48hpi_I_bio1	2021	413.215	2372.53	207.373	201.536	405.187		585.218	9752.53		30.5457		9.25764	20.3262	144.052	1237.62	49.6912	24.8025	2.07253	126.429	54.914	15.8496	4.3054	35.7466	8.96237	8.2189	20.7186	38.7142	12.7893	4.98641		21.662		45.0092	30.9702	97.578	239.183	402.763		40.4762		28.685	76.8243	33.4169	5.24587	4.25518	14.6575	2.31611	26.8315
F26P92_48hpi_I_bio2	2021	867.641	3330.41	553.385	460.081	598.982		1331.12	20085.2	29.8855	136.003	105.659	47.5209	94.5379	545.166	1041.67	144.088		3.44596	569.742	102.582	107.96	28.4473	174.08	30.8698	20.5533	35.4308	252.531	32.543	6.72237	30.661	34.7713	6.60152	163.747	54.6706	300.836	566.578	1735.49	6.59448	538.353	90.935	220.467	281.335	725.701	159.419	30.2508	313.734	54.3619	784.969
F26P92_48hpi_I_bio3	2021	563.127	3993.98	335.9	263.954	745.763	118.574	696.554	11955.2		5.83331	2.02974	34.8938	138.11	543.872	984.252	150.905		5.50115	340.017	66.5349			144.316		8.2512	23.8959		29.1977	12.2432	27.8371	54.8612		185.799	33.7353	9.65976	598.352	609.514		155.128	46.939	259.034	499.125	149.418	28.1893	8.47534	247.861	22.9155	539.013
F26P92_72hpi_I_bio1	2021	696.095	3222.78	344.98	213.648	317.928	118.757	961.997	13836.9		55.7435	155.263	26.0103	67.362	335.165	1201.92	110.9		2.7376	343.294	94.2338		16.6847	260.442	31.1041	16.131	28.4117	119.656	22.992	15.207		66.5112		78.5882	69.775	165.12	602.442	419.063	0.180858	182.562	64.1446	50.9651	193.378	258.749	37.8531	7.18776	118.337	31.8602	193.299
F26P92_72hpi_I_bio2	2021	189.882	1437.3	266.511	152.133	66.0298	57.9123	443.559		7.60868	27.5996	138.129	53.7491	92.1169	628.088	1250	45.0873	1.97292	4.32381	424.627			20.9271	275.53	18.2611	66.4787	42.514	233.379	16.7361	18.3315	10.8699	17.0701	7.81957	66.2315	830.226	722.792	1053.7	1617.03	14.662	854.199	237.561	39.6158	113.657	522.127	77.4628	29.732	788.825	130.648	2433.47
F26P92_72hpi_I_bio3	2021	313.243	2275.58	279.358	293.808	197.546	96.0468	1126.37		20.563	70.0264	128.328	48.1998	164.545	1004.01	1136.36	61.5273	12.4423	8.70044	527.855	112.665		19.6784	449.201	17.4637	69.3385	43.1845	230.126	31.5314	42.5971		20.9716	7.64159	112.133		621.534	738.367	1677.92	18.6105	685.18	39.7141	165.67	213.826	538.249	77.5076	43.8855	303.016	142.59	856.591
F26P92_0hpi_NI_bio1+2+3	2021	314.673	1882	213.471	139.212	100.793	43.7333	437.774	10668.3		41.2704		30.6892	88.0434	528.78	1024.59	50.9263	0.208719	1.95191	277.835			8.04569	74.6884	13.0251	14.1969	31.0221	57.4111	18.3324	17.0964	48.8074	73.5013	1.06054	41.7348	69.3618	282.841	530.293	1193.21		87.4942		127.82	44.7025	96.3711	14.7144	3.40141	67.9769	20.324	216.324
F26P92_24hpi_NI_bio1	2021	397.016	793.219	418.696	171.774	186.094	105.557	300.346			32.9348		47.3694	115.412	727.475	1050.42	38.0428		8.57467	427.132				136.537			24.2083	199.929	25.6406	31.1918	10.2961	17.33	153.653	161.824	66.2649	25.3209	141.479	56.9241	1.51784	734.319	14.2337	122.506	249.483	612.083	67.8536	5.34343	116.049	101.28	622.682
F26P92_24hpi_NI_bio2	2021	1288.62	1548.68	1289.69	358.75	256.037	322.451	477.546			20.1115		44.7928	108.124	649.839	1157.41	78.007		23.8551	563.594				147.146			19.6476	95.774	26.4254	47.7119	30.2843	41.7827	39.8844	129.028	61.427		114.396	50.0232		306.679	118.742	231.519	173.954	480.108	95.7316	7.55792	418.799	111.651	1199.95
F26P92_24hpi_NI_bio3	2021	283.324	1455.31	391.429	228.323	208.664	97.9269	574.11	12036.9	146.471	76.9368	194.98	189.351	157.645	949.257	1179.25	52.5659	4.37794	16.4908	419.35				201.368	29.0126	39.5382	25.5392	361.616	24.1237	59.2042	52.7001	25.9365	19.9785	210.726		1460.78	422.101	105.561	52.1952	1539.25	114.959	306.643	265.505	748.766	168.914	18.3438	420.111	242.667	1932.73
F26P92_48hpi_NI_bio1	2021	230.355	762.934	313.628	200.076	140.57	87.3973	337.53					44.5824	90.2548	607.709	1213.59	77.84	0.812498	8.08678	563.881				446.098			83.1487		138.886	37.9083	186.085	102.746	110.823	94.7484	271.866	11.9576	1436.51	585.734	123.896	330.198		156.058	104.968	376.286	136.057	30.7182	154.537	168.051	696.934
F26P92_48hpi_NI_bio2	2021	523.833	1381.6	560.889	194.578	210.043	2.41825	451.008		129.564	91.0429	249.308	51.797	69.2664	384.793	1213.59	63.6377		10.2083	316.591		23.5212	32.683	156.157	28.1921	26.9441	25.9863	168.027	19.6447	32.9801	12.71	29.4816	4.07339	104.89	92.658	732.371	264.839	80.1603		354.669	78.5794	243.708	156.997	404.67	107.408	14.2701	219.643	42.8439	435.434
F26P92_48hpi_NI_bio3	2021	298.421	2958.08	236.434	188.92	255.751		701.049	9441.61	240.163		154.498	570.731	81.1872	464.06	984.252	50.5087		1.09213	200.821				97.0645	19.1114	12.2529	24.964	101.8	27.7863	15.3866	39.6893	48.9158	2.15698	75.582	40.1394	202.944	411.213	383.757		168.323		84.3856	113.076	130.334	19.4247	2.72964	18.7065	8.88651	31.6508
F26P92_72hpi_NI_bio1	2021	494.834	1086.44	330.833	146.51	138.32	154.721	371.956		116.477	50.0359	153.951	65.6855	40.0803	213.154	992.063	44.4111	3.96464	1.48325	273.149		29.2956	5.20975	133.68	7.43116	10.8766	90.3537	46.3144	10.8585	13.7416	31.6385	30.1423	1.79708	44.3125		315.876	256.069	36.4047	1.02098	67.6199	10.7493	120.462	84.1901	81.9527	17.1129	10.4459	35.4301	24.7515	345.26
F26P92_72hpi_NI_bio2	2021	395.321	986.542	382.723	115.994	87.5974	106.04	220.951		169.942	14.7034	213.588	82.3894	66.5623	420.104	1086.96	51.0549	0.702291	5.31415	396.759				97.3501	26.7918	11.8336	12.282	134.38	11.3069	22.2375	17.8281	39.8706	2.12063	43.666	37.9607	373.076	151.394	19.6739		320.087	42.2021	139.329	63.8324	311.165	18.6066	7.26074	234.737	34.3343	1093.03
F26P92_72hpi_NI_bio3	2021	101.885	245.21	177.164	57.3257	44.7805	28.2511	115.778				452.611	15.4055	49.9587	326.952	1179.25	148.139			898.908			21.2442	128.152	20.2653	29.433	30.3261	106.666	30.2455		10.7318	289.984		42.4899	208.905	674.825	1033.09	90.1826		176.701	34.1102	126.308	59.977	149.683	18.7851	7.58817	152.607	68.9125	511.024
F13P71_0hpi_I_bio1+2+3	2021	351.75	673.576	377.268	183.089	121.86		354.055		24.3886	135.277	24.1622	21.5819	67.7829	434.993	1126.13	52.5859	2.04495	5.0951	552.991		34.5923	22.5425	245.425	19.3125	33.8616	39.5907	211.469	9.17835	36.4686	78.9939	20.8107	22.5237	115.903		535.572	646.287	2311.1		762.333	546.941	221.059	140.781	909.417	156.708	57.4077	1340.34	101.158	3749.8
F13P71_8hpi_I_bio1	2021	284.978	1462.08	248.4	132.565	73.4373		374.323		97.4276	65.1775	12.3443	38.4643	121.434	873.693	1000	37.1463	0.527432	5.04668	420.016			16.0936	121.814	17.6275	23.201	17.5083	154.781	4.79165	30.5561	10.7923	16.9884	6.24752	76.2556	136.02	334.225	328.288	56.9322		556.46	57.3093	86.5017	91.2604	469.143	30.0517	10.4569	371.059	79.37	2089.11
F13P71_8hpi_I_bio2	2021	188.887	514.229	319.775	131.762	160.455		227.408		69.2821		303.637	15.027	71.4414	453.806	1024.59	47.4898		10.7584	308.52		11.7208	35.6133	213.87	20.5259	31.3664	22.6731	201.389	20.8139	49.8944	31.7517	28.0388	11.2049	81.4784	53.649	1595.44	152.06	62.8672		467.439	26.481	274.426	88.5685	287.85	67.0715	9.48793	127.958	86.1542	485.414
F13P71_8hpi_I_bio3	2021	239.295	438.937	266.639	121.02	193.538		200.602		35.3799	76.6486	8.3754	27.9675	40.1987	219.524	1146.79	37.4678		4.39867	253.056		13.8315	24.3832	126.869	20.2451	19.9168	24.3174	147.154	36.1883		18.0482	25.3717	3.11457	68.4903	50.7688	453.121	135.174	36.5361	3.25599	362.704	68.1506	182.994	109.361	234.366	38.5505	8.24458	205.542	38.5689	565.617
F13P71_24hpi_I_bio1	2021	187.59	430.328	323.678	132.765	87.0813	8.1915	223.928		18.9134		23.4597	33.9397	82.2581	541.125	1116.07	65.2863		11.197	398.753		14.0242	29.387	159.571	23.3728	28.851	28.0884	235.676	50.7716		23.222	45.9098	9.21884	109.593	122.17	2091.62	444.462	180.697	17.2237	705.883	138.89	332.754	145.517	437.075	85.0538	12.9608	596.76	98.3085	2167.2
F13P71_24hpi_I_bio2	2021	273.873	1217.1	214.286	162.006	371.352		368.747		39.4119	86.727	4.9936	13.9083	78.7156	442.756	1068.38	46.081		7.67861	235.987			24.8823	58.5615	14.818	10.6173	16.1933	111.946	10.7502	9.46108	11.6287	23.7311	1.77445	107.707	93.1066	167.833	63.5776	36.4618		196.851	96.6737	222.344	212.156	145.538	63.3983	6.6623	254.18	30.0666	494.173
F13P71_24hpi_I_bio3	2021	444.807	1412.11	517.074	216.052	137.008		471.167	9490.56	4.42525	103.578	27.3919	16.5579	84.5741	519.67	1116.07	66.1252		15.8992	283.217		30.6374	31.9386	177.869	27.186	32.6579	22.5754	226.352	9.13289	3.63611	30.9551	26.863	12.7413	79.5265	110.193	2875.72	177.395	76.5449	20.0525	689.537	93.7369	226.234	124.642	491.382	117.396	15.8033	305.686	85.909	803.216
F13P71_48hpi_I_bio1	2021	670.473	1386.84	619.518	172.096	181.904	166.791	256.077		1.04613	41.6982	5.49427	66.3174	42.3615	244.055	1096.49	50.4278			310.085				94.4853		23.9398	20.1683	147.913	23.6756	22.7667	24.4815	34.3308	28.669	66.087	61.3903	8.13083	229.158	95.9658	0.860498	358.976	294.4	162.524	122.119	426.274	51.2547	18.3536	900.148	42.2593	2298.08
F13P71_48hpi_I_bio2	2021	424.717	1270.18	473.333	142.321	171.876	90.0819	250.052			59.1169	277.771	9.76309	91.0494	521.057	1225.49	49.4194		8.41359	297.847				60.0301	12.4459		17.6157	72.1676	13.8104	18.6451	20.1922	45.2238	2.581	58.4407	13.4358	509.787	91.8656	32.6783		116.797	35.0959	144.865	113.572	105.441	15.8662	4.60325	179.339	39.4091	751.172
F13P71_48hpi_I_bio3	2021	465.944	2429.86	369.633	236.515	217.114		605.006				9.03243	34.273	41.9532	224.73	1213.59	50.5822		1.96648	404.606	105.317	15.4672	7.17449	154.47	21.433	32.7548	33.8123	154.451	50.717		71.5055	30.6156	5.31843	55.9297	91.7812	252.103	579.987	1773.74		374.461	92.162	46.8842	77.4044	397.928	52.7472	10.2024	135.896	33.7794	232.022
F13P71_96hpi_I_bio1	2021	198.483	596.676	313.659	137.28	68.9987	4.73206	288.196		181.447		303.119	833.641	75.1572	445.644	1106.19	57.6198		3.61059	486.462				202.791	17.3589	21.1614	29.339	131.948	4.43156	61.0911	73.9837	54.8924	5.24537	67.0723	75.0757	1391.62	603.5	509.827		309.633	151.534	396.809	55.8696	328.396	34.9078	8.15167	543.726	134.4	1808.6
F13P71_96hpi_I_bio2	2021	455.825	946.852	437.041	216.846	283.773	2.01008	430.339		920.236		5.87221	182.24	54.2214	350.897	1136.36	41.5695		3.936	329.183	26.9487	11.8291	16.8964	70.9342	10.5359	8.64786	13.9028	58.3049	12.0109		5.38953	27.5656	4.35072	76.5656	41.5175	271.736	184.809	56.484	1.3973	125.905	135.491	135.212	164.855	115.782	37.622	16.2182	377.21	37.175	769.259
F13P71_96hpi_I_bio3	2021	264.726	1167.99	287.046	134.545	118.048	87.9546	289.056		27.2472	82.4397	217.867	30.177	160.441	1017.85	1179.25	58.8649		6.10526	484.919				123.436	27.8343	1.72716	20.0831	288.818	20.2643	45.736	38.3195	26.1675	7.80744	72.1183	118.189	1030.29	213.736	34.7292	2.66653	1158.9	25.4856	193.008	88.1435	459.09	36.7448	7.10666	129.246	89.6354	454.279
F13P71_0hpi_NI_bio1+2+3	2021	387.877	2475.88	276.439	274.26	883.059	61.1492	413.607			46.271	146.563	10.2053	172.752	875.067	1136.36	50.0458		13.1177	176.042				53.5812	11.3072		25.9078		18.2806	10.2871	7.09158	77.201	1.53901	300.742	17.102	2.09762	259.495	59.3399		119.746	5.20095	197.172	486.423	51.5057	11.6585	1.52105	24.2694	6.62698	46.7109
F13P71_8hpi_NI_bio1	2021	298.21	1111.14	393.011	124.216	131.916	72.5475	220.406		293.765	80.9003		56.5056	82.3457	477.75	1146.79	62.0292		7.99768	269.757				85.8128	17.7789		19.8898	99.3846	12.1328	21.1996	18.8199	38.3377	3.02973	58.6983	27.3938	691.531	60.6508	37.0125	2.57003	210.921	209.612	313.442	94.6331	195.222	32.9613	9.02745	743.833	42.4157	1885.74
F13P71_8hpi_NI_bio2	2021	233.408	819.283	305.879	129.52	238.356		259.909	4985.75	72.9585	112.6	10.8824	18.5574	42.665	243.356	1213.59	46.6844		2.96093	227.295	34.8295	3.79594	20.698	52.632	27.3652	14.411	20.2506	173.909	25.5821	12.2152	17.6946	25.402	3.70762	59.2923	39.4801	228.574	102.155	30.9442	1.66527	384.897	9.94044	111.632	94.4417	295.556	29.5534	7.02765	53.2922	22.8505	187.847
F13P71_8hpi_NI_bio3	2021	147.935	2050.58	159.369	68.8908	99.7288		309.617	4615.97			86.5884	58.8188	26.3501	143.516	954.198	40.6634	2.85785		145.392		5.65893	25.3126	46.6115	25.1223	16.6032	17.7578	122.643	23.5964	5.84425	12.9449	29.4622	3.27129		96.5786	5.49105	347.433	87.2697		174.174	7.66491	45.896	59.8352	120.506	10.9892	2.56067	30.3333	2.48651	68.4403
F13P71_24hpi_NI_bio1	2021	246.472	1223.96	227.763	139.493	584.441		414.551		156.067		118.833		84.0976	448.127	1237.62	56.5798		1.70757	240.406		6.4203		62.2346	20.7081	7.68658	9.90887	108.832	8.9564	8.4651	5.93541	60.9423	1.27673	173.048		119.681	96.2015	10.7312		173.441	15.3206	117.437	323.766	106.754	12.0222	4.25121	40.2394	6.90533	58.6418
F13P71_24hpi_NI_bio2	2021	531.481	1226.44	403.791	233.729	1515.26		560.769		213.434		130.73	57.519	65.2939	343.736	1213.59	55.7491		0.990765	195.45		11.9666	44.3894	65.0766	23.814	17.7925	22.5909	105.562	18.0836	11.0993	16.3322	43.5566	11.9179	318.112	44.4516	171.653	243.794	75.2785		164.335	129.208	368.251	561.178	159.956	29.9907	6.57654	26.9689	12.8594	42.6863
F13P71_24hpi_NI_bio3	2021	345.55	784.155	374.402	206.297	400.846		670.435	8541.24	124.39		212.024	81.3507	46.7082	189.576	1190.48	66.1079	30.6918		184.83		13.3221	56.7484	44.1022	16.9055	10.6525	17.577	96.4738	18.9303		6.89042	40.2395	9.73524	125.569	40.1045	2.99734	394.781	121.742		181.6	49.1	266.789	287.477	119.073	58.3517	7.74562	237.221	7.48519	698.206
F13P71_48hpi_NI_bio1	2021	226.336	3262.52	224.331	160.901	103.477	47.6795	229.008			72.2856		48.0925	81.2904	520.528	1116.07	35.9264		36.4692	219.509			18.3364	169.085			41.7813		84.0641	25.7378	22.0692	22.4784	82.4035	99.8617	211.715	1527.64	696.473	143.849		1860.31	22.379	238.198	110.784	565.071	112.641	7.13049	122.2	59.3567	418.022
F13P71_48hpi_NI_bio2	2021	422.425	1630.91	456.77	202.454	82.2851	100.407	393.899			12.9843	269.691	128.571	153.476	1040.87	1157.41	42.4553			403.376				201.755	6.86765	33.4261	17.7015	272.801	34.902	47.3682	25.9454	16.8771	165.775	141.978	112.586	2311.41	208.167	61.7639	15.6358	1478.09	316.927	169.113	150.115	667.338	123.338	26.4808	1013.49	403.053	3964.95
F13P71_48hpi_NI_bio3	2021	483.442	867.793	394.096	197.941	834.749	2.26804	450.429		710.73		250.693		59.3168	308.39	1225.49	43.1515		1.01841	213.736		6.44551	31.1018	42.9144	8.99611		12.6916	33.7796	10.1193	6.50817	3.96967	51.145		173.496	14.8837	252.056	91.9392	20.8894		36.4098		64.8445	379.74	37.7802	12.9176	3.61412	206.211	4.60827	355.161
F13P71_96hpi_NI_bio1	2021	243.983	473.197	320.069	184.342	381.746	12.0607	364.152		95.3841	213.09	12.4233	49.2735	54.0645	277.518	1179.25	58.3037		3.90102	423.024			42.0178	83.356	24.1469	28.8696	31.8192	220.132	54.0921		22.3269	32.0981	13.2963	131.918	69.7654	419.246	919.012	193.274	2.78708	416.248	28.2228	773.269	237.749	443.003	136.526	33.6603	179.977	42.3826	571.379
F13P71_96hpi_NI_bio2	2021	233.563	2041.78	218.297	93.9983	148.554		390.328		28.9273		127.663		42.2362	212.928	1146.79	45.4281			113.748			8.48606	109.353	14.7834	8.28236	22.2317	67.5971	15.7008		21.3419	30.3316	0.875113	50.6615	150.231	131.884	397.947	402.492		111.441	130.474	53.7181	108.03	73.5909	9.19299	5.01581	219.91	2.89547	336.331
F13P71_96hpi_NI_bio3	2021	218.378	2724.12	125.151	143.456	326.783		386.011	7097.28	37.3757		53.6517	16.846	41.1851	234.165	1059.32	43.1351			211.417				100.164	23.7296		27.2483	135.988	30.3702	6.63586	38.2408	37.6358	1.07179	78.7335	88.1826	7.04426	330.089	742.836		261.424	43.5751	14.7824	163.251	112.572	18.0689	2.49423	58.1629	8.28252	90.2444
NY42_0hpi_I_bio1+2+3	2021	226.788	1412.44	205.747	95.6705	168.556	0.875183	251.171	4378.38	87.3709		78.8788	60.1398	35.9853	194.335	1041.67	55.4587			237.091			20.0763	76.5291	34.6942		15.2422	123.971	14.5984	5.95427	31.0519	57.4728	12.7992	37.7173	38.7343	5.56707	157.731	62.0136		204.48	51.1932	21.0575	69.9635	124.163	13.5127	7.66188	61.8721	2.55516	95.4975
NY42_8hpi_I_bio1	2021	155.074	2099.12	186.04	81.9286	153.826		305.124	4517.16	22.4607	21.501	75.496		73.0084	382.556	1157.41	79.5237			179.794			23.1882	50.1232	30.3841		11.838	133.988	9.16228	4.60682	19.1644	46.504	1.15922	53.2152	83.4727	4.15762	85.0447	168.557		205.01	56.8156	42.8031	127.777	100.046	19.1664	4.98562	66.2922	2.09106	91.4505
NY42_8hpi_I_bio2	2021	320.536	2676.28	268.832	170.173	398.091	1.06228	446.561	7275.27	47.7749		92.5208		115.652	618.797	1041.67	103.732			373.378		6.18018	36.7802	100.193	51.1003		15.3665	215.291	10.1704	9.29692	25.0879	83.4098	1.01821	91.5948	58.4977	8.48958	234.843	149.07		362.927	15.6519	90.743	196.799	175.524	24.7919	5.41751	97.5903	4.02592	300.201
NY42_8hpi_I_bio3	2021	198.701	2133.77	153.35	151.459	322.353	1.53303	391.415		110.965		55.1094	35.4166	24.7593	132.766	1168.22	50.399			210.624			16.1434	47.0025	32.5673		13.7415	156.317	13.2298	3.68737	16.3017	42.0827	1.97905	68.4649	36.5963	9.47396	115.3	62.6923		263.998	47.5158	17.6869	131.74	137.511	33.1895	6.17471	58.9452	11.2903	107.28
NY42_24hpi_I_bio1	2021	283.761	2801.18	266.692	106.797	77.9881		427.619	6205.3	110.861	26.9107	197.132	56.8973	44.274	270.616	1201.92	68.206	0.915732		224.291			13.2012	248.241	44.8222		16.8903	125.618	12.8924	6.67988	25.6809	54.6665	4.20712	26.9717	41.957	3.61348	127.73	93.7015		210.001	21.9065	80.3357	69.1619	143.397	13.365	5.59564	118.831	2.93576	362.331
NY42_24hpi_I_bio2	2021	89.622	546.625	71.9975	35.7462	121.607		125.395		30.7098	4.59196	62.3347	20.6753	19.8224	109.412	1201.92	32.8627	0.569727		113.681		2.01319	12.4958	38.7388	19.3562	6.02289	13.7764	64.3842	8.67188		17.4904	42.9525		32.5404	12.646	4.22665	57.0477	98.2977		105.355	7.70371	30.373	73.4014	64.2462	2.98051	2.13362	18.9189	1.9362	47.2235
NY42_24hpi_I_bio3	2021	105.492	915.817	83.7966	51.7808	119.905	0.469955	124.611		92.4358		59.3493	77.238	18.4631	111.738	1050.42	41.8442			208.652			13.9456	57.5863	27.9902		12.9508	100.814	14.0184	2.23895	19.1267	42.3887	1.18905	27.3973	13.7755	7.09394	92.834	71.5567		163.332	51.9041	36.9879	52.7304	70.3491	3.90375	5.68059	122.346	1.64312	225.496
NY42_48hpi_I_bio1	2021	177.01	1248.78	143.661	106.137	437.88		346.47	4756.06	104.268		52.9725	54.0743	84.6529	433.116	1068.38	54.6502	1.55797	1.14413	145.473		2.98081	29.729	61.3154	8.44648		12.5818	72.5131	14.6625	4.4216	9.93912	41.7784	0.656243	141.498	38.8078	2.72441	105.372	80.7113		122.644		171.942	279.349	48.0122	11.3839	2.58237	21.0127	1.62663	29.1858
NY42_48hpi_I_bio2	2021	118.63	2425.84	100.271	127.001	564.593		364.722		388.264		32.8687	62.4169	78.1795	394.812	1157.41	51.3336		0.673043	199.792			34.0733	84.1036	39.5714		29.162	244.6	32.0284	4.27298	60.96	43.0172	1.14754	145.048	16.8596	12.1553	71.5328	50.2611		429.827	15.2823	38.8047	285.645	180.688	24.0484	7.15397	62.4883	17.8892	152.574
NY42_48hpi_I_bio3	2021	361.08	3611.29	263.39	211.847	697.78		517.691		99.8237		117.567	39.9379	142.373	741.863	1157.41	90.6406			335.182			47.8165	112.359	51.9457		13.7709	315.031	20.0913	8.55674	30.4962	60.6373	1.42669	181.121	38.3092	14.2846	127.954	83.1354		587.795	52.3091	200.708	354.665	277.233	47.3475	7.52871	195.445	6.85921	511.397
NY42_96hpi_I_bio1	2021	271.257	1963.46	250.832	150.494	384.224		499.595				106.052		113.834	625.721	1136.36	109.9		12.8379	421.064			34.5223	78.5138	42.6315	9.92061	19.8483	289.784	17.2626	9.69821	32.5422	77.8281	1.71157	135.753	12.319	16.8899	86.4493	123.5		542.229	10.8317	113.354	270.575	189.662	29.1011	14.9991	61.5438	18.6462	310.675
NY42_96hpi_I_bio2	2021	215.443	2796.72	211.229	163.972	522.465		493.521		32.0264		40.6785		125.05	623.022	1250	92.3156			328.493			43.1561	61.6828	53.5761	6.65354	15.2106	258.374	11.3781	4.08829	24.4786	60.7519	1.29421	116.501	44.1181	7.67593	135.78	65.4795		380.266	33.3913	15.1384	236.091	135.586	33.1061	8.85619	35.5954	9.76374	70.5961
NY42_96hpi_I_bio3	2021	95.3649	1147.18	76.6572	109.987	572.586		303.191		21.6764		27.9104		58.7957	292.177	1146.79	33.533	0.294222		113.864			16.431	41.6835	15.0764		12.4201	130.705	13.405	2.89721	14.6971	33.0912	8.22536	127.023	21.8303	12.5818	105.353	67.3553		239.776	65.2618	173.509	246.971	90.8775	6.74174	1.94804	18.7178	2.04491	19.6291
NY42_0hpi_NI_bio1+2+3	2021	117.512	1555.89	94.6262	90.7423	460.877		312.764		27.5714		41.1046		63.3466	328.66	1225.49	39.8086	0.350257		149.35			20.8631	53.6265	31.3537		15.9031	194.961	13.1713	3.2704	22.4979	41.8662	12.7837	130.208	21.1952	18.1266	107.842	66.3011		358.655		261.065	266.769	135.66	10.3605	1.27528	24.4833	1.79172	26.347
NY42_8hpi_NI_bio1	2021	160.534	521.351	152.313	24.1782	21.883		158.416	2650.83	310.04	7.78341	200.774	267.699	30.9462	213.435	1077.59	40.4107			230.477			5.59179	51.2864	8.22388	5.24342	8.89439	36.6742	6.11723	8.51867	9.53094	58.8208		19.6011	26.0307	1.26734	91.8362	67.8515		71.4853	9.75075	91.3553	53.2711	33.6044	3.975	1.24248	33.87	3.9825	78.0774
NY42_8hpi_NI_bio2	2021	233.566	4052.14	161.684	152.354	324.838		408.773		478.588		64.3401	201.973	103.541	581.373	1096.49	65.914			374.146			26.31	106.684	71.8146	12.7204	19.334	326.984	24.1192	5.71859	46.2715	72.9973	5.556	77.6335	58.0786	31.5185	160.694	109.841		737.973	125.033	71.2563	151.977	343.702	25.2347	5.37784	230.019	22.358	475.403
NY42_8hpi_NI_bio3	2021	402.588	605.945	323.857	38.1816	110.081		230.039			6.87999	229.188	224.947	31.4157	186.638	1050.42	43.4931	0.28006		195.256			11.8065	54.1306	8.34396		8.11194	27.0812	4.51527	5.52533	6.88592	87.3191		51.5661	6.5851		45.5792	45.8699		24.1156		146.433	119.099	27.5468	3.49365	1.3483	15.9781	1.70405	51.587
NY42_24hpi_NI_bio1	2021	202.093	1158.86	163.781	64.2805	344.884		252.702		42.9754	5.80751	65.4816		42.9284	222.717	1237.62	44.1639	0.975889		190.929			16.2019	48.4223	16.8124		11.3687	73.5912	8.09582	4.11315	11.7809	52.9884		87.2958	39.6906	3.59529	153.63	56.5582		113		88.8927	217.946	60.7563	4.9572	2.16441	25.0029	3.07351	34.1816
NY42_24hpi_NI_bio2	2021	247.95	1013.73	228.101	84.646	103.981	2.06652	235.186		96.0704		170.303	125.287	24.4519	134.677	1077.59	34.323			219.959		4.36823		63.5962	15.2961		8.90862	44.6619	6.93739	6.00179	13.4817	50.7021	1.78698	22.5579	32.6847	2.18985	213.194	89.8851		61.5361	6.23404	58.9309	44.7012	56.3659	8.7652	3.24279	27.0445	3.69216	69.3398
NY42_24hpi_NI_bio3	2021	215.164	818.274	177.168	101.03	257.253		266.739				130.178	125.963	20.2157	97.1009	1225.49	22.5794	0.271503		108.696			12.4331	24.3323	17.5557		11.9236	51.6444	10.8477	3.47137	16.8989	32.9369	0.702044	66.5706	6.73971	2.63547	66.0425	154.146		53.7842	5.85651	64.6289	174.212	52.2121	7.31812	3.06748	21.7318	1.56456	76.7854
NY42_48hpi_NI_bio1	2021	328.102	1600.01	262.155	111.678	566.367		468.517	6361.38	280.819	12.6701	82.3529		76.0877	408.309	1213.59	69.0916	1.38351	1.96416	263.728			23.4104	103.498	34.3724		12.8031	201.103	10.2159	7.67256	11.5237	75.1905	17.3642	185.217	19.1901	11.1176	56.0812	58.7477		364.306		411.822	371.067	214.605	17.1242	2.20472	34.2173	4.87636	47.0465
NY42_48hpi_NI_bio2	2021	256.054	1019.22	282.721	35.0536	59.1259		229.962		674.588	5.77619	160.906	110.73	27.1916	160.742	1126.13	52.5509	0.270639		227.871			9.29786	65.8319	28.4034		9.93299	97.3562	6.66396	5.9968	14.1519	49.5501	2.19412	29.5662	6.32363	3.84533	34.0711	32.8909		134.176	14.072	125.027	82.0546	93.1443	7.01004	2.13093	78.1542	2.77158	245.856
NY42_48hpi_NI_bio3	2021	345.567	2014.01	259.501	160.179	408.991		466.015	7100.2	441.238		89.8187	76.3735	42.2595	249.842	1157.41	59.477	0.917286		289.906			19.4023	47.985	29.6982		17.0029	173.795	14.7736	5.90113	27.2913	68.3985	4.37383	124.354	53.1132	16.6467	207.395	214.859		358.397	136.301	88.2236	295.361	168.51	29.2503	59.3937	213.216	3.50873	414.609
NY42_96hpi_NI_bio1	2021	310.942	676.381	246.684	27.9899	37.1176	1.48498	182.364	3198.34	91.8836		110.183		313.836	322.48	1201.92	87.4875	0.373148		329.006			9.79164	67.4116	15.7559		23.5707	90.716	8.40041	8.16841	10.3272	100.958	1.50631	27.8487	31.5368	4.1749	81.6835	95.9854		126.942	23.4157	166.093	52.4266	82.8697	5.64737	5.32956	80.3433	1.08443	192.812
NY42_96hpi_NI_bio2	2021	164.784	951.612	132.8	95.6896	425.28		303.338		133.401		65.1516		56.4612	306.708	1213.59	43.9072	0.603685		183.557			17.2649	77.8752	13.8266	9.29039	12.1763	118.237	11.1182	4.91475	8.18048	59.7479	3.29273	158.829	30.4178	9.22213	164.136	106.678		205.98	76.832	202.418	293.464	81.0931	7.78851	1.31672	21.6175	2.43148	31.674
NY42_96hpi_NI_bio3	2021	420.923	711.781	313.688	135.934	536.894	1.2699	366.458		161.253	9.79028	144.156	53.0064	31.945	155.962	1237.62	39.7698	0.274802		144.636			12.2485	23.7935	16.3054	11.0357	11.8666	63.9121	12.1323	6.48113	13.2952	38.5845	25.2458	135.895	12.9912	3.74705	43.1593	68.1964		102.138	43.2734	145.708	306.228	89.9479	11.9787	2.49106	143.523	3.67426	321.711
BC4_0hpi_I_bio1+2+3	2019	168.03	2745.51	414.854	685.669	1138.2	101.331	1522.94		0.843291	140.446	197.311	40.9631	102.111	633.667	1237.62	103.499	800.697	417.194	258.096	76.9092	402.79	984.564	171.044	33.5663	54.368	73.2184	276.878	40.1165		167.225	25.2465	38.7437	204.526	851.314	146.649	1446.95	614.39		458.919	465.08	166.535		94.7236		190.106	431.863	28.3668	576.826
BC4_24hpi_I_bio1	2019	198.88	2340.48	402.366	588.605	2530.83	49.6355	922.085	16831.7	70.8684	49.4596	115.533	60.5679	102.652	644.597	1024.59	122.709		36.3176	247.974	106.966		38.5585	105.786	63.2051	15.1632	54.4596	265.308	35.9997	20.2833	75.4701	48.9579	55.2078	316.99	75.8525	71.7066	434.03	36.6956		452.569	346.872	336.464		174.456		7.61436	189.671	17.8601	154.222
BC4_24hpi_I_bio2	2019	316.991	3758.82	565.529	718.873	2089.59	65.322	1388.83	27266.6	19.7487	68.0358	208.469	58.189	111.945	759.033	1168.22	159.037	53.3054	45.2894	315.793	168.125		38.3001	141.987	96.6008	15.8306	77.1803	353.858	47.5885	47.8036	102.417	54.5104	72.7718	296.267	140.758	110.522	506.782	100.938		564.24	304.725	373.473		228.313		13.2838	212.393	21.2479	180.859
BC4_24hpi_I_bio3	2019	258.783	1684.47	294.068	452.507	968.936	30.0373	802.332	16985.5	89.6907	27.2044	268.605	19.6496	61.8347	417.69	1106.19	75.4878		38.3098	187.853	68.9706		13.8308	79.187	30.0707	14.0523	49.4464	145.497	35.8263	37.6948	80.7495	28.9133	32.2869	128.452	41.1072	154.479	206.617	42.8959		238.065	391.453	76.1383		88.7486		7.56607	218.11	21.3293	210.035
BC4_48hpi_I_bio1	2019	241.821	2683.4	319.347	477.454	1850.8	33.0632	1067.78	22236.6	2.6342	34.7974	106.198	27.9218	93.3799	614.668	1237.62	95.1886	4.12451	24.6346	158.572	74.6871	23.8531	34.3459	77.8726	26.9801	15.6435	45.8387	144.907	38.0086	19.2538	59.9376	35.6457	46.8239	242.026	43.4479	66.1455	121.735	40.4459		248.498	427.463	146.556		93.9795		7.37895	233.165	21.2373	198.739
BC4_48hpi_I_bio2	2019	320.571	3018.84	425.511	717.104	3663.43	47.2661	1215.64	23106.4	139.337	51.2921	141.042	74.419	146.341	911.692	1157.41	107.512		23.2386	210.445	84.4727		40.8558	156.157	52.0698	15.9625	68.6444	250.62	49.7071	32.0961	59.4119	40.1448	69.664	407.346	296.594	76.8543	826.93	106.206		399.107	436.54	358.879		172.712		4.26083	300.357	16.5863	203.96
BC4_48hpi_I_bio3	2019	229.145	1651.29	405.095	532.706	1615.53	43.1806	787.926	17159.8	31.8532	44.2623	222.736	43.6991	93.8509	580.606	1250	179.348		64.7102	426.888	108.784		29.7181	166.789	120.908	17.5309	91.6159	415.013	54.9271	48.7253	133.449	62.4214	64.3342	247.154	146.257	201.412	665.316	97.3119		756.189	513.412	251.373		358.217		10.4383	420.618	18.0787	357.874
BC4_96hpi_I_bio1	2019	299.156	2309.07	406.206	660	2870.49	38.739	997.953	18324	36.8615	54.1519	151.576	41.1341	113.533	689.248	1016.26	137.525	4.33736	55.4591	219.665	252.259		62.6157	119.098	55.6504	73.2313	60.9648	220.613	32.0691	59.4425	42.3228	34.1743	68.4324	318.522	303.451	132.64	335.638	110.379		344.368	1715.17	254.969		188.789		47.3464	738.724	31.0066	697.981
BC4_96hpi_I_bio2	2019	228.847	2831.38	335.013	699.618	2967.64	45.6128	1046.13		208.649	58.5181	110.036	53.116	120.08	706.868	1016.26	174.297		73.5225	307.881	230.996		74.4115	132.524	152.566	52.338	62.6768	557.879	38.6688	32.6897	58.6428	40.7046	82.8372	392.466	20.8561	76.6752	136.033	57.6607		786.778	1304.76	235.726		306.095		26.1872	726.013	14.1303	795.262
BC4_96hpi_I_bio3	2019	1723.67			5676.56						253.185					1213.59													1679.21	281.578				105.984					960.754				1.63819e+06
BC4_0hpi_NI_bio1+2+3	2019	279.819	3141.59	231.954	372.41	729.562	38.8786	723.986	16659.1	330.587	38.1411	88.7643	264.291	164.97	1155.26	1096.49	241.293		55.7805	319.364	91.6656		51.3736	137.719	79.8255	9.9496	50.8509	370.757	29.8489	12.9326	87.2014	59.1905	33.6016	146.505	269.672	39.8146	443.469	205.021		648.54	112.686	56.3742		147.803		10.4375	67.2882	11.5015	37.7281
BC4_24hpi_NI_bio1	2019	391.022	2751.66	476.222	455.487	989.941	58.0288	816.269		289.008	52.6599	245.362	377.515	81.0879	602.56	1179.25	224.117		85.8841	301.187	67.6874		48.4638	177.057	63.8273	47.407	54.8703	254.082	40.4257	39.9328	128.312	60.9585	43.2643	180.995	712.552	129.615	693.379	409.219		424.564	483.011	245.275		156.328		13.4993	241.426	18.1114	173.234
BC4_24hpi_NI_bio2	2019	418.531	3491.52	725.081	558.089	1201.71	106.987	1182.82		11.2815	125.673	148.501	108.058	129.047	972.515	1116.07	218.424		63.3785	349.195	78.2971		61.6322	158.306	44.1761	15.4226	55.865	355.142	32.5046	26.8843	72.1874	63.8427	68.4787	220.715	193.098	78.6481	382.927	132.181		602.584	250.18	151.979		146.934		25.9008	149.618	24.5674	91.7238
BC4_24hpi_NI_bio3	2019	249.465	3197.32	234.185	334.245	500.088	51.2846	693.953	15150.3	48.3433	46.4134	52.3689	93.8905	187.413	1109.97	1000	195.654		40.8844	315.908	90.137		49.2471	83.2721	101.593	26.3831	50.6554	473.093	31.6651	25.9336	111.282	45.695	36.8966	111.596	124.761	32.1415	283.402	454.907		671.895	103.629	45.2797		212.743		8.0796	62.7669	10.7994	38.4695
BC4_48hpi_NI_bio1	2019	215.415	3509	549.874	381.735	791.158	81.9688	776.936	16914.5	85.5154	81.4258	170.468	145.573	104.455	754.744	1106.19	331.952		85.9342	479.673	79.1012		48.6179	238.03	70.3467	21.598	53.337	309.748	28.6428	19.8909	106.478	73.7748	48.2888	169.516	47.5301	69.1523	183.98	260.218		505.748	286.851	106.484		163.33		13.0816	135.545	34.8059	110.812
BC4_48hpi_NI_bio2	2019	365.611	3070.06	538.385	383.972	743.584	66.5895	871.176	18833.4	789.937	70.2951	136.842	443.499	131.292	913.183	1086.96	326.958		61.8382	471.77	62.3513		42.6391	208.909	53.3474	12.9089	39.8222	314.22	24.8972	19.4623	63.0145	113.425	50.2704	176.586	168.83	61.3067	544.044	168.121		477.462	1465.04	237.4		130.833		15.1885	521.551	17.6213	422.361
BC4_48hpi_NI_bio3	2019	370.829	3723.51	352.993	488.047	1152.5	81.8493	854.635	17659.4	508.427	81.3782	86.2157	319.958	157.67	1057.63	1024.59	222.227		67.2411	300.736	68.7709		54.3617	212.622	81.5079	17.4107	46.9069	486.425	34.3055	12.765	103.146	41.8596	45.9871	208.987	132.155	51.3622	370.868	203.648		673.393	279.706	78.0491		204.315		23.9014	148.593	13.3237	99.711
BC4_96hpi_NI_bio1	2019	2710.79									136.943				148.459	1096.49													1317.92	383.56				77.6873					2246.09				790871		81.4794
BC4_96hpi_NI_bio2	2019	385.65	3097.19	586.606	440.134	981.929	77.9693	905.015	15248.5	652.815	73.9551	124.168	532.52	96.4261	750.357	1201.92	269.199		70.9727	419.964	104.059		62.5169	253.589	71.3663	44.1949	88.585	327.778	41.5815	38.0518	99.2901	59.7784	51.4446	179.642	502.894	69.7943	948.8	603.143		542.387	355.338	160.502		190.834		20.1741	302.618	19.4499	799.87
BC4_96hpi_NI_bio3	2019	3085.5			4251.67						110.393					1237.62													1688.42	371.297				101.057					1929.16				1.01567e+06		162.41
Kish_0hpi_I_bio1+2+3	2019	5026.1							7364.62		176.586					1116.07													1673.96	382.612				55.1961	212.131				2524.21				853636		227.201
Kish_24hpi_I_bio1	2019	335.332	2655.81	339.022	755.72	2703.72	41.7097	1136.06	22380.9	323.178	58.2897	198.792	90.431	94.6546	686.728	1237.62	137.667	28.8743	79.8623	235.134	136.541		120.738	91.5988	58.3231	25.6227	70.399	306.281	47.8195	44.6241	73.3086	31.4673	78.1174	306.594	28.0771	126.319	135.689	43.2808		599.41	187.368	170.349		164.485		26.5624	118.495	11.7278	82.347
Kish_24hpi_I_bio2	2019	547.31	2581.75	456.665	665.228	1588.07	66.4936	1160.9	23874.6	16.1564	97.8932	129.654	62.2395	100.482	797.48	1033.06	247.372		95.5622	519.382	143.747		67.672	181.276	153.204	65.6939	67.8862	685.172	47.0526	57.1925	98.9267	66.584	104.307	275.796	259.086	84.0371	227.476	42.9412		979.024	1667.35	200.051		430.614		8.1822	807.84	26.0381	745.815
Kish_24hpi_I_bio3	2019	398.815	1212.86	351.69	453.741	1379.21	33.6989	779.351	19241.9	135.422	52.1108	229.982	161.902	85.8982	549.227	1059.32	134.295		93.8347	397.99	188.642		47.4261	163.937	129.316	40.0062	76.8426	406.482	92.5232	49.2944	82.219	55.1432	64.0529	182.973	64.3432	176.44	155.515	78.3457		802.768	1377.93	214.985		296.306		11.1626	587.717	30.8256	661.993
Kish_48hpi_I_bio1	2019	302.657	2201.44	442.786	422.095	1100.77	53.1465	808.758	17394.6	109.581	61.543	162.626	67.2896	88.8935	697.76	1050.42	188.24	2.87388	83.8262	434.683	130.112		44.5317	184.641	75.9033	53.6524	52.1886	427.228	31.1169	47.4287	68.3093	55.1869	59.1178	204.856	47.3606	125.704	168.488	43.1632		678.57	2638.75	190.376		194.894			1029.72	17.5	886.327
Kish_48hpi_I_bio2	2019	145.219	2443.95	295.627	298.971	836.904	35.6392	693.378	15996.6	196.098	46.8089	92.0005	63.6095	111.119	701.582	1250	214.063	4.06769	66.4797	469.692	147.937		95.3544	143.625	101.22	14.4564	55.6511	419.657	41.9321	22.475	70.9482	204.975	57.5352	149.59	31.3722	68.8633	158.335	43.3132		739.206	1488.23	123.611		219.171		8.87348	551.396	20.9722	476.741
Kish_48hpi_I_bio3	2019	192051														1050.42
Kish_96hpi_I_bio1	2019	401.918	1049.32	239.609	507.493	1565.41	28.621	774.582	17832.3	19.0714	41.1447	234.881	69.6357	93.3705	585.02	1237.62	167.464	22.0547	60.588	299.821	251.065		26.5412	161.381	90.053	23.1557	150.454	325.09	131.621	42.5432	253.504	60.9503	64.3925	220.82	527.132	258.623	902.174	160.475		707.952	1250.34	210.925		290.649		104.695	897.934	34.7369	715.085
Kish_96hpi_I_bio2	2019	266.721	1594.75	304.452	652.622	2373.83	34.2279	784.747	15224.8	40.2007	28.6877	181.426	32.6206	86.9668	563.511	1096.49	115.163	3.37083	40.306	265.452	88.168		27.3804	108.598	63.9527	13.8493	65.9286	205.343	55.4315	27.0931	75.6037	42.2943	47.1197	255.292	179.573	111.633	397.553	63.603		376.69	559.666	110.826		153.711		8.83504	425.159		402.055
Kish_96hpi_I_bio3	2019	4891.59														1136.36													3265.97	658.446	616.062			163.871					2141.63				1.98041e+06		324.147
Kish_0hpi_NI_bio1+2+3	2019	279.497	2543.82	417.766	684.085	2133.9	54.4285	958.072	18062.7	107.799	41.3141	218.159	54.3866	94.6069	615.277	1096.49	136.367	2.72915	45.7424	296.795	81.452		33.0726	114.004	64.3154	26.1581	51.9629	260.317	45.2891	34.8366	136.196	41.298	52.3612	281.352	635.971	154.838	608.279	137.465		444.069	293.346	152.442		188.973		7.99977	173.605	27.3481	142.859
Kish_24hpi_NI_bio1	2019	232.77	2808.21	371.728	368.969	657.183	48.3575	792.918		288.78	43.1785	73.3738	262.426	81.7773	602.264	1008.06	164.72		54.4349	268.03	69.7818		44.3461	113.044	56.767	16.104	50.3629	321.415	37.8657	17.4138	68.3058	36.9823	45.2629	129.217	146.531	45.8466	352.375	123.636		560.21	199.815	145.281		158.547		38.3998	197.918	15.5888	301.893
Kish_24hpi_NI_bio2	2019	212.05	3988.26	614.128	1072.99	3249.29	79.4854	1522.98		366.017	80.1318	193.442	146.764	150.049	1208.92	1225.49	146.804		82.2086	211.797	77.1471		74.0393	149.018	45.7893	24.2535	50.6914	324.969	38.9267	24.3509	77.4996	24.205	71.6324	437.545	273.953	73.5034	537.904	117.415		472.567	1141.36	165.463		100.236		7.12448	513.151	14.8391	511.335
Kish_24hpi_NI_bio3	2019	526.043	3994.14	490.075	806.044	2752.88	66.3213	1330.83	25510.9	367.821	68.4052	213.546	114.045	118.313	758.146	1237.62	152.656	3.20335	56.4991	349.24	84.5462		45.0817	153.125	105.663	17.6408	61.7132	385.337	46.6761	32.8897	94.9624	58.8932	92.8253	332.703	185.698	136.038	483.011	75.4796		712.634	767.154	369.473		300.207		4.34979	503.972	36.9307	384.959
Kish_48hpi_NI_bio1	2019	124.071	1624.98	71.5751	298.432	1925.89	18.7259	499.868	8131.19	74.0813	17.2786	33.1345	282.233	84.648	424.829	1250	43.3598	3.61588	24.2336	76.404	140.902		32.9515	88.2066	16.4028	19.4812	65.3602	144.024	98.1268	10.2485	374.946	11.5008	30.7124	274.648	1301.86	30.4303	876.83	650.226		295.489	173.229	53.4043		37.2654	24.0811	22.6235	114.871	10.7913	259.399
Kish_48hpi_NI_bio2	2019	124.863	4169.4	299.943	369.634	618.734	61.9557	815.637	17285.4	38.7074	82.3402	138.179	727.813	273.354	1278.87	1136.36	195.665	14.5272	70.0469	348.168	392.637	18.6664	49.1592	490.643	103.674	22.7817	128.052	499.461	134.933	55.2059	336.844	53.5056	64.742	135.785	1950.09	162.169	2200.42	868.783		809.682	1065	138.655		224.848	8.09134	112.819	500.427	34.2039	275.589
Kish_48hpi_NI_bio3	2019	155.527	1783.3	111.49	344.97	2292.6	24.9144	592.211	9900.35	48.7847	30.2039	52.7327	208.419	95.2889	456.334	1146.79	49.19	38.8871	24.2151	66.662	124.893	66.8941	31.2274	107.763	15.0437	15.9414	57.4211	145.006	78.6182	46.8058	275.704	11.0137	33.1004	301.136	566.337	43.7997	991.547	570.302		250.004	308.884	128.387		38.8061		42.4497	105.177	22.048	125.688
Kish_96hpi_NI_bio1	2019	3214.41									84.5153					1106.19													1597.98					78.1432					795.37				1.1844e+06		120.605
Kish_96hpi_NI_bio2	2019	356.702	3440.23	473.255	884.827	3559.83	57.7933	1425.64	27272.9	124.965	57.9112	97.2615	118.543	159.398	950.326	1201.92	153.597	4.32611	36.5765	272.713	96.5906		45.7268	187.985	68.1746	22.7265	65.001	331.9	48.064	23.6816	164.166	40.118	81.2398	447.798	627.447	72.4802	1403.29	157.034		574.307	348.309	228.756		198.245		6.11763	357.538		295.227
Kish_96hpi_NI_bio3	2019	258.566	4175.93	569.948	702.348	1882.48	77.4089	1155.44		213.547	68.1557	212.233	209.019	100.72	868.952	1190.48	171.841		73.2469	316.11	67.279		49.7717	149.379	80.6469	21.5309	47.7369	337.088	30.3538	24.077	89.8857	47.4427	63.8303	279.578	391.607	78.1503	414.795	129.019		587.731	1006.57	115.48		176.12		14.3408	407.893	26.1828	320.128
Terold_0hpi_I_bio1+3	2019	187.32	2073.76	108.98	338.256	1990.95	24.7473	583.502	9247.36	93.773	30.7616	40.4512	137.19	100.231	450.492	1168.22	59.7564	2.25468	24.2809	99.5019	110.165		43.9435	97.5034	23.9101	12.9789	45.0532	184.818	56.1407	11.1783	234.609	15.3291	36.7996	301.428	273.144	34.6219	751.9	710.237		314.212	240.274	68.8674		49.0703		21.2667	97.3727		123.466
Terold_24hpi_I_bio1	2019	239.214	3089.02	184.73	476.103	469.654	38.1276	1307.02	25862.9	33.6274	58.1531	175.516	427.442	100.556	597.658	1237.62	153.294	14.5425	59.6457	274.982	202.892	20.5124	12.4421	326.065	25.9866	35.2535	119.48	161.886	111.008	43.8055	458.416	39.41	42.365	94.1402	1411.82	92.8981	2020.65	687.766		194.8	246.552	91.8569		49.7052		17.4064	110.747	39.1498	98.7008
Terold_24hpi_I_bio2	2019	251.7	6456.7	473.197	572.121	1042.13	73.6349	1359.64	25820.9	401.109	96.6209	142.409	802.684	346.438	1591.88	1201.92	239.623	8.28326	70.9056	422.284	184.512		61.0296	341.63	86.4567	24.7921	126.674	518.855	105.046	45.9802	660.666	75.0746	86.9826	266.982	607.473	84.6502	2063.41	981.381		760.541	212.841	261.174		187.23		34.926	93.4006	27.1287	94.6691
Terold_24hpi_I_bio3	2019	164.636	2874.75	94.3074	287.811	370.757	34.9178	771.843		27.3008	39.7141	71.3229	96.2884	192.612	1005.98	1146.79	156.472		92.6411	360.412	209.244		504.902	173.529	147.874	12.5019	123.109	545.189	53.6872	13.1125	99.3186	44.1949	36.7356	83.5594	1718.33	55.1959	468.76	188.683		707.099	1377.92	51.657		212.749		98.6328	535.308	59.4743	652.839
Terold_48hpi_I_bio1	2019	309.33	2837.11	178.061	363.251	1185.19	32.0307	657.832		25.4876	45.4745	82.9634	372.038	158.922	797.457	1106.19	87.6365		53.1125	196.022	228.171		40.805	210.681	48.0529	24.4741	81.5174	344.228	81.1091	19.4034	366.422	27.3972	44.2686	220.984	1383.45	64.6404	1537.33	1106.79		560.949	1241.25	91.8115		92.5307		6.91421	540.879	19.2183	580.566
Terold_48hpi_I_bio2	2019	264.164	3388.8	240.24	280.29	528.894	40.6353	665.895	13790.1	72.6583	57.0291	154.254	608.026	177.546	900.215	1168.22	171.557	4.06388	51.6736	332.908	152.406		25.7903	245.252	50.7009	24.5593	105.508	256.961	89.1809	33.5507	368.493	54.2275	33.7868	117.77	824.481	77.9854	1560.09	548.519		430.764	806.929	83.4753		87.8831		11.8386	305.95	29.9433	349.697
Terold_48hpi_I_bio3	2019	190.486	2803.24	231.848	326.631	1104.53	68.2426	654.415	12827.9	211.381	73.4649	89.1143	377.179	247.548	1123.17	1157.41	113.508		36.4082	233.416	245.355		239.81	182.511	32.6325	29.3062	559.853	224.403	185.142	28.6179	518.004	30.5086	32.1779	235.43	3065.23	58.8277	1518.84	550.687		419.412	1185.68	67.7156		66.8599		6.46728	576.622	32.0302	574.096
Terold_96hpi_I_bio1	2019	255.113	4276.96	409.629	289.058	818.069	40.3106	672.881	12869.3	53.9602	42.2102	137.907	247.757	113.26	621.694	1050.42	245.906	5.20255	52.52	405.143	74.7503		40.1977	141.246	38.356	12.4736	48.742	260.826	37.232	26.4837	203.274	78.3651	46.3941	174.393	83.5984	71.3836	690.098	396.574		373.265	570.944	200.991		87.9119		36.0826	207.709	25.7881	272.394
Terold_96hpi_I_bio2	2019	196.281	3921.72	436.353	429.158	934.562	56.5065	903.18		233.638	70.5305	131.408	917.17	104.652	619.772	1116.07	107.868	2.96225	56.4985	254.352	187.957		35.8599	327.227	42.8313	31.629	121.619	324.025	122.869	27.7064	389.977	36.5605	75.1085	202.655	1704.07	96.3722	1847.59	1328.75		501.618	321.769	155.686		94.1917		10.8825	155.771	50.951	136.887
Terold_96hpi_I_bio3	2019	227.703	3500.35	256.987	413.631	610.821	39.086	1016.44		68.5141	62.9974	141.169	450.858	220.545	1245.96	1201.92	145.703	4.22246	58.3262	327.118	305.877		27.1572	377.792	41.7917	33.3701	177.592	265.533	147.082	45.8221	462.079	50.0366	61.4434	141.405	2015.6	112.589	2080.39	843.732		455.956	2868.04	171.493		96.883		9.99238	1100.3	83.2929	1499.2
Terold_0hpi_NI_bio1+2+3	2019	279.432	3034.66	261.571	328.44	452.135	57.6468	889.432		44.9456	67.2585	86.7914	92.2167	123.599	756.57	984.252	176.609	1.75272	45.5609	381.322	109.1		280.575	146.339	51.0225	10.6366	196.303	306.873	37.1028	22.3392	51.0904	70.2454	38.8432	108.84	1257.92	54.1174	1035.2	174.402		489.748	1361.47	89.3894		91.7464		16.2838	448.296	34.3474	469.969
Terold_24hpi_NI_bio1	2019	340.501	3416.68	365.448	358.646	586.83	47.487	882.941		178.823	47.1868	174.086	570.08	114.499	661.7	1136.36	130.061	13.0134	41.7504	319.246	171.467	27.5609	24.5474	201.182	39.47	18.6193	156.845	229.039	146.885	40.6775	456.048	44.2681	39.9075	115.256	617.228	98.8325	1400.19	835.924		355.089	461.412	119.022		74.0749		23.2515	152.228	20.7204	161.214
Terold_24hpi_NI_bio2	2019	231.429	2582.98	150.959	263.374	617.747	22.3273	527.505		139.033	29.4852	95.1488	199.14	121.664	597.478	1077.59	108.223	1.68247	47.0317	282.027	132.997		29.1902	136.427	75.5135	12.8955	72.1418	291.739	66.0313	12.9527	435.238	32.5316	32.2156	115.058	462.127	64.5905	964.961	672.026		466.848	365.871	43.2769		93.551		12.7271	275.307	17.6157	795.893
Terold_24hpi_NI_bio3	2019	337.861	2146.9	286.61	290.712	295.706	52.6296	775.432		390.556	79.2818	178.325	382.357	104.801	678.368	1168.22	149.597		51.3447	487.041	169.82		321.905	221.577	43.9552	16.679	389.755	235.566	43.413	40.676	86.6934	56.8576	29.5842	73.5013	1064.19	98.1032	1161.46	168.937		383.723	480.785	210.686		81.36		22.1039	288.73	32.819	221.991
Terold_48hpi_NI_bio1	2019	530.839	4471.56	599.027	748.253	915.087	128.301	1711.66		25.687	134.347	184.642	84.3327	107.311	653.971	1096.49	312.294	804.501	112.092	530.806	115.33	592.565	24.3271	193.073	104.665	25.4223	68.2634	522.98	88.8869		382.511	73.402	554.61	172.694	108.113	209.38	718.142	1065.03		865.897	337.952	178.581		286.311		188.125	134.267	35.2213	126.408
Terold_48hpi_NI_bio2	2019	179.409	4256.34	437.095	582.225	1343.31	114.53	1313.59		56.8889	140.171	99.1052	110.565	131.032	758.046	1179.25	241.158	196.37	86.5566	452.501	166.076	135.982	40.9703	180.034	80.2973	26.561	55.9114	547.081	51.7358	25.159	323.321	51.0372	132.193	263.482	2098.04	83.715	1414.14	880.563		772.183	277.639	106.545		164.629		55.1835	110.94		85.0236
Terold_48hpi_NI_bio3	2019	249.058	3361.29	241.669	447.516	713.246	46.4534	1137.15	22233.7	53.2201	65.7566	114.069	151.214	90.0598	544.929	1250	173.263	28.8826	88.5443	333.023	240.869	16.5376	25.2599	257.699	63.8176	30.2984	82.9605	367.973	57.7482	51.0309	166.505	42.3714	41.5414	134.03	683.416	89.9407	1794.58	866.632		574.116	349.676	123.505		102.782		41.1187	111.94	15.073	75.5659
Terold_96hpi_NI_bio1	2019	295.209	3002.6	245.721	470.661	1171.1	47.7222	937.067		153.471	64.2744	100.05	119.619	75.6887	429.051	1086.96	129.023	16.338	90.1133	265.024	186.887		24.68	148.206	73.7241	25.1624	59.3039	348.375	43.371	24.731	173.683	33.7198	53.7965	218.864	467.642	103.24	1333.82	631.552		571.986	317.794	135.233		153.309		64.937	148.193		117.21
Terold_96hpi_NI_bio2	2019	336.32	3652.93	356.719	483.052	750.763	80.7307	1352.82		62.5016	110.335	182.124	193.212	124.119	714.349	1157.41	235.4	385.628	118.921	443.785	169.8	314.12	30.0171	279.689	60.111	31.6349	88.1493	437.297	76.943		383.656	51.1293	317.384	137.666	679.412	199.006	1720.15	1353.22		713.663	344.319	73.6955		125.829		90.9367	137.537	27.3785	102.606
Terold_96hpi_NI_bio3	2019	231.163	3848.69	183.099	452.628	610.453	55.2812	1140.33	22562.1	12.5835	89.4669	81.7024	96.9101	85.0308	494.005	1126.13	197.27	174.349	174.902	317.389	165.03	92.7718	15.1549	144.204	67.1638	52.6	61.6592	401.478	59.3513	36.0646	258.534	38.4744	153.223	107.387	639.294	78.1645	1058.26	1124.39		624.319	373.979	57.9523		128.248		118.911	132.886		125.527
Bianca_0hpi_I_bio1+2+3	2019	98.9906	3718.85	297.501	486.731	970.339	63.8254	1275.65	26337.3	81.3804	82.5593	106.081	157.692	92.9707	538.752	1106.19	183.271	176.753	103.592	331.508	139.431	105.63	28.6065	154.366	56.6724	88.0184	62.4789	356.869	57.292	46.5586	283.615	36.7331	106.522	180.102	229.625	128.135	941.998	1513.84		603.969	1572.48	88.5282		125.071		147.946	543.043	17.5167	586.306
Bianca_8hpi_I_bio1	2019	153.418	4288.3	368.437	646.265	1924.31	66.2899	1381.25	24890.4	95.4468	91.401	130.555	148.039	128.113	687.457	1225.49	230.298	44.3462	98.25	450.749	265.238	32.2564	49.7536	205.032	128.683	51.3081	90.0354	531.249	75.2305	63.0813	253.843	59.0587	81.1905	342.974	219.703	145.522	1514.59	1796.01		833.381	473.111	194.71		230.833		102.395	251.949		310.106
Bianca_8hpi_I_bio2	2019	105.475	2143.84	138.996	642.846	3870.91	28.6408	995.513	15193.7	62.345	38.186	118.059	50.7361	132.798	677.396	1213.59	79.4187	3.12712	37.1172	192.984	89.3641		54.0856	68.8761	25.0497	32.6631	48.8571	172.416	49.7153	27.5403	60.0912	33.304	80.0635	443.801	40.3463	88.8749	128.018	48.928		310.521	318.542	115.068		70.3228		9.1747	130.258	572.262	153.212
Bianca_8hpi_I_bio3	2019	114.063	1440.1	112.94	310.245	1723.94	20.3361	492.06	7883.01	20.1916	26.7342	26.3587	43.363	86.9888	474.897	919.118	59.9226		23.7062	163.968	62.0934		84.6896	41.1925	29.2111	19.3781	28.3692	187.377	20.6795	11.0061	33.5752	21.3347	35.2071	264.725	14.9712	18.148	75.3735	27.8831		348.804	163.85	47.045		56.1938		7.11637	67.1512	11.1867	77.7442
Bianca_24hpi_I_bio1	2019	119.53	2425.05	133.174	316.87	1390.34	31.7288	621.379	12370.7	182.283	144.968	89.8255	128.513	73.4098	434.908	1136.36	61.615		41.4762	140.213	91.1069		84.2002	92.7996	35.5138	47.9273	52.8465	189.868	60.3216	20.3316	122.5	77.5577	33.7861	208.613	1297.93	55.4725	914.92	258.651		322.29	122.015	70.2292		51.1599		20.9698	86.781	10.6581	71.0197
Bianca_24hpi_I_bio2	2019	135.955	3291.5	385.941	397.522	957.036	79.8015	935.569	17460.8	152.288	73.8738	111.94	172.835	146.233	877.401	1116.07	228.869		56.6557	478.709	101.78		78.9029	144.082	84.6074	27.6897	55.4002	410.777	35.5719	21.4236	111.263	87.199	54.3829	229.062	498.417	59.5183	435.759	916.108		586.926	327.365	192.721		131.801		36.5341	123.353	17.4762	118.2
Bianca_24hpi_I_bio3	2019	44.7813	2348.66	99.6937	313.737	1661.22	22.9175	540.038	10226.4	44.4014	102.663	51.5924	106.425	101.41	617.283	1213.59	84.2485		38.5632	231.202	87.0073		64.4672	92.3612	48.6802	35.1409	49.2544	277.197	28.7081	12.3378	133.244	49.2631	30.6281	254.115	549.385	40.4755	556.699	561.849		500.357	339.471	36.9805		84.3652		31.5582	143.179	12.0663	187.959
Bianca_48hpi_I_bio1	2019	73.982	2916.68	182.681	249.683	1042.74	29.0124	491.878		90.5965	25.9708	56.1128	107.699	76.997	448.835	1250	115.839		35.8135	264.975	44.9485		49.6971	101.533	51.4256	17.7713	31.068	255.729	21.3355	9.06975	84.095	29.1827	28.9745	180.589	465.898	41.2918	309.714	130.987		399.451	342.869	50.0774		76.6783		8.97708	132.6	14.8505	142.018
Bianca_48hpi_I_bio2	2019	288.567	3462.64	659.168	668.669	1367.84	83.0704	1361.41		483.933	100.689	476.76	397.084	103.015	617.02	1106.19	124.003		60.6827	318.143	56.4428		44.0936	195.858	66.4926	34.2586	62.9543	280.398	46.1243	63.6467	64.2557	36.9328	84.7942	280.969	288.996	222.078	574.261	107.513		388.311	461.393	532.837		120.761		6.15996	209.332	61.8911	181.959
Bianca_48hpi_I_bio3	2019	84.1298	3184.7	487.595	573.094	1595	81.113	1009.14	19139	611.587	65.5561	352.443	296.996	90.2254	521.807	1190.48	122.729		51.8207	325.622	63.9192		36.4681	159.009	57.4181	35.2708	45.7912	244.208	38.2471	45.1083	69.6318	34.2494	55.1235	273.784	504.457	201.922	793.342	253.94		366.488	769.794	233.742		119.302		10.1325	404.957	34.7738	426.282
Bianca_96hpi_I_bio1	2019	161.288	2606.22	183.579	386.784	1398.58	57.6747	667.28	12172.1	244.165	46.2789	72.1608	226.851	182.043	901.679	1168.22	163.393		43.3559	324.624	69.7921		71.7668	126.847	105.594	21.3419	50.5279	479.001	38.2911	14.6647	196.305	46.1115	34.0665	266.556	434.331	53.1762	632.126	354.674		603.401	181.507	96.5251		154.091		9.89287	82.7521	28.6017	110.666
Bianca_96hpi_I_bio2	2019	205.09	3733.45	423.076	510.401	1465.83	64.5265	1247.68		246.684	72.6597	217.246	330.319	185.945	1013.77	1213.59	194.007		44.1943	422.414	62.2273		69.9295	155.549	58.1477	24.2708	46.8647	304.392	39.6678	42.419	95.3322	91.5539	54.2855	285.57	348.024	112.789	746.081	226.291		509.847	454.301	269.464		132.94		6.86213	196.159	52.2026	180.475
Bianca_96hpi_I_bio3	2019	140.647	3516.75	490.647	393.146	1433.5	66.9103	892.413	16895.8	732.629	83.7345	184.445	329.862	113.232	682.499	1256.28	214.59		55.8564	470.236	66.0694		53.0726	119.236	37.4063	16.5139	47.2263	237.907	30.1866	27.9543	79.4292	87.1667	53.2345	273.756	165.685	82.6641	233.126	245.666		363.193	2815.99	218.81		81.622			802.541	31.6366	663.172
Bianca_0hpi_NI_bio1+2+3	2019	135.296	1926.73	436.892	378.506	1315.43	61.3931	779.344	14092	40.2089	66.2992	137.446	68.3558	73.4077	446.143	954.198	131.447		41.2408	328.54	51.2576		33.3996	97.054	61.7326	12.7069	34.0129	229.073	24.0614	24.0792	42.4422	53.8199	48.8817	232.253	36.9283	71.3403	164.78	85.42		377.079	363.153	240.019		126.017		8.49075	191.512	39.1469	172.33
Bianca_8hpi_NI_bio1	2019	250.754	3286	266.681	472.76	1949.43	50.1235	864.961		78.301	41.1353	75.6218	167.8	107.977	660.276	968.992	144.143		48.0783	358.627	60.9412		64.3936	114.923	62.6853	21.1109	39.9344	318.071	34.759	16.1402	102.145	53.2408	52.9536	323.379	176.555	71.3398	285.773	192.731		599.565	533.364	99.1599		139.519		9.64858	366.603	24.3149	331.094
Bianca_8hpi_NI_bio2	2019	94.1622	2456.22	275.646	513.114	2093.92	49.065	766.763		472.615	39.9574	213.046	544.35	109.105	553.167	1237.62	116.426	3.97096	66.2815	255.683	72.7068		46.0289	97.3518	53.9834	32.6552	87.043	248.92	36.6672	26.0071	103.647	33.3763	45.6973	334.47	346.413	108.402	366.318	157.002		410.751	561.582	298.903		103.765		12.7127	275.116	47.2222	393.024
Bianca_8hpi_NI_bio3	2019	86.8297	2175.75	325.956	407.347	1308.4	55.5563	767.822		213.383	51.8394	130.68	289.286	121.313	717.07	1250	164.875		30.3553	378.311	66.9688		57.8807	219.698	40.7153	21.7228	43.1606	235.342	30.7635	34.668	57.183	70.1721	51.312	253.134	347.321	79.2095	489.673	182.164		390.526	717.788	282.223		139.285		11.2233	391.586	38.625	331.124
Bianca_24hpi_NI_bio1	2019	157.216	2378.82	328.9	646.659	3371.96	51.2259	1036.01		116.915	46.5363	109.11	154.964	120.638	702.417	1106.19	100.749		28.1501	255.58	56.0215		52.9052	105.784	32.5864	13.198	43.5725	180.694	33.4471	19.4501	42.4077	40.7643	54.9014	462.529	69.7932	49.1351	181.993	102.74		283.271	758.72	144.934		77.0942		14.0225	510.731	36.8235	662.333
Bianca_24hpi_NI_bio2	2019	139.482	1373.32	159.278	185.554	575.785	30.7141	384.038	7871.67	257.551	26.9393	113.041	168.986	50.3814	343.158	1016.26	112.805		34.7258	330.852	52.0869		29.1622	71.6858	29.4366	11.2907	35.0199	147.423	17.4923	11.5299	81.9933	54.1022	14.5505	119.5	30.9466	32.6916	245.707	164.606		238.525	218.036	40.5314		41.5209		5.74723	84.0793	15.8725	70.3233
Bianca_24hpi_NI_bio3	2019	206.977	2210.85	280.993	325.045	928.287	33.5197	630.077	12885.4	427.652	27.7902	293.069	244.051	46.8596	294.01	1096.49	60.0018		39.3218	217.343	62.4536		31.553	79.3205	33.0437	16.4291	63.7012	116.298	29.6473	21.5151	147.307	27.7935	24.2373	131.023	33.143	131.968	279.567	233.715		183.599	492.739	74.9264		56.0032		8.2511	255.428	28.01	205.912
Bianca_48hpi_NI_bio1	2019	261.604	3373.62	310.025	769.155	3206.14	52.2914	1240.91		994.456	45.5462	55.0664	537.855	123.486	763.285	1050.42	109.379		47.1671	312.595	65.8335		89.823	96.0985	43.1394	29.7186	49.9179	264.856	37.9	21.4596	170.138	33.8906	63.4401	463.461	226.526	31.6313	680.163	338.685		507.174	152.223	89.8938		82.9534		14.8881	108.574		51.6424
Bianca_48hpi_NI_bio2	2019	182.874	4908.95	613.591	946.727	3141.5	99.5275	1607.94	29597.3	1802.66	87.3636	232.467	427.274	158.295	921.989	1213.59	175.891		86.3954	409.3	97.7095		84.1553	198.447	81.4041	56.3366	72.3264	464.818	48.4664	58.6722	195.388	45.681	109.553	537.572	377.248	121.655	1029.9	468.35		718.326	2272.66	485.396		177.881		19.7137	1475.25	45.8035	1344.21
Bianca_48hpi_NI_bio3	2019	244.932	3751.21	611.662	557.546	2161.09	87.8459	1168.22		1428.58	85.161	134.868	297.334	165.449	968.166	1237.62	235.289		52.2106	487.634	64.3609		83.2247	134.247	59.022	14.1691	39.4035	371.239	27.7828	29.5056	59.177	103.532	79.5899	427.245	24.5306	64.2308	133.07	121.708		566.647	293.036	443.035		134.798		7.02669	183.959	26.7404	185.092
Bianca_96hpi_NI_bio1	2019	179.106	2606.07	178.034	504.578	2554.93	40.0648	818.559		162.303	31.1964	44.7155	156.902	104.556	645.294	1116.07	94.154		28.6716	238.716	79.5474		70.1037	102.723	51.4285	20.4465	47.3755	279.635	40.6779	12.6102	119.17	33.9294	53.4275	390.54	411.32	31.4036	534.592	537.398		495.146	446.545	84.2116		102.546		9.04128	240.433	18.4756	152.098
Bianca_96hpi_NI_bio2	2019	92.9567	2509.4	235.966	371.321	3486.66	40.7912	703.218	11211.6	157.733	32.2796	63.8892	80.3865	109.958	659.92	1250	98.1341		32.4673	218.441	74.8838		59.706	67.7082	15.9072	28.2214	40.7335	112.077	22.6274	12.9	41.8081	34.4544	38.1238	415.815	38.4231	28.43	143.668	87.9977		168.944	273.754	143.735		32.5763		7.44708	196.367	50.5953	251.393
Bianca_96hpi_NI_bio3	2019	253.196	3595.3	412.31	877.835	2934.19	101.005	1602.12		662.954	121.286	90.0285	869.716	247.238	1346.06	1096.49	142.908		40.2674	294.072	64.2642	15.2745	97.1547	141.309	32.1125	92.0827	35.0873	278.529	25.1677	36.951	52.715	48.7994	106.378	536.674	68.8097	41.487	341.913	117.812		444.588	287.961	328.682		86.7346		10.473	200.733	31.014	149.874
F26P92_0hpi_I_bio1+2+3	2019	525.744	14009.2	81.2884	805.243	1077.31	54.1625	2914.63	59383.3	177.024	78.9013	123.636	84.564	519.159	2715.53	1190.48	272.203	50.4452	18.9385	379.826	174.345		51.5254	177.72	56.5237	27.4472	225.738	1441.87	296.453	102.209	620.194	46.6353	154.131	296.2	101.732	432.88	978.569	924.923		2338.12	793.595	94.065		248.208		66.0537	838.957	28.928	1016.7
F26P92_8hpi_I_bio1	2019	462.043	4357.64	302.19	520.065	1280.68	101.795	1094.82		310.842	103.713	70.8599	991.744	284.347	1499.94	1059.32	191.06		45.7907	423.319	74.9823		86.3849	215.216	57.3259	24.5894	44.7027	397.001	27.7585	31.0913	106.632	60.4142	63.2118	302.968	1041.12	40.9292	1168.11	461.075		592.336	383.579	238.703		133.782		4.17551	260.863	29.5211	186.702
F26P92_8hpi_I_bio2	2019	843.55	11348.9	93.7333	649.933	726.556	32.3438	2188.49		34.9189	54.0728	69.5862	69.4859	283.605	1645.86	1146.79	171.748	111.25	41.2351	272.782	165.968	36.976	24.1531	126.825	53.6773	18.003	185.74	1302.51	349.516	77.1689	488.176	30.1992	80.7531	231.915	368.099	387.53	1219.08	963.462		2049.22	879.713	42.1614		210.812		55.0701	1709.42	75.8156	2491.82
F26P92_8hpi_I_bio3	2019	264.551	4194.88	560.154	831.432	2579.13	100.825	1443.82	25519	13.0187	99.1937	136.092	64.5787	147.293	833.941	1201.92	259.482	215.576	56.3034	395.898	124.274	172.757	47.6775	140.208	101.387	21.6759	60.6185	506.54	31.6442	33.365	181.104	50.3033	174.167	436.146	153.744	112.738	702.112	671.014		768.606	965.27	220.445		290.1		37.7723	939.036		1070.7
F26P92_12hpi_I_bio1	2019	211.919	9.34267	0.690823		13.2004	0.174274		95.2065			12.7091		1.07307	1.26725	1213.59				4.14919	67.0676		4.31714	14.441		0.915546	27.1885	1.56893	11.7206	5.14885				3.6958	3.50522	15.0768	4.96778	5.06716	0.301396	3.92174	93.1154						40.9635		83.3882
F26P92_12hpi_I_bio2	2019	168.714	4325.9	643.963	753.276	1451.2	99.248	1770.73	34474.1	73.0203	131.858	109.273	157.296	126.049	812.217	1086.96	192.37	7.11789	44.2175	380.036	71.6854		45.4174	153.705	44.3726	16.0328	47.0329	325.527	30.7283	40.7168	76.8798	54.0937	129.295	280.578	98.2653	64.2444	687.218	563.349		545.744	1137.3	220.952		136.948		89.3506	900.173	37.0553	652.459
F26P92_12hpi_I_bio3	2019	88.0146	33.4921	0.589977	1.56149	3.67783		4.13536	135.507			14.2626		2.28586	2.69949	1096.49					62.2602		3.51113	17.7751		1.01776	25.9627	1.22659	15.7777	3.53982			4.30337	2.50893	15.2884	14.5124	21.364	5.32358		2.50521	289.498	10.3739					198.844		491.748
F26P92_24hpi_I_bio1	2019	284.291	4711.93	225.481	360.555	490.279	62.9323	981.91		41.8158	91.5923	104.823	739.244	202.582	1200.5	1190.48	191.962	14.5893	69.8495	413.796	318.842		29.9253	325.302	71.0712	46.006	161.2	469.582	186.291	43.4926	580.622	59.7563	40.1648	110.5	2173.74	114.551	2120.79	1079.92		761.923	2978.71	104.946		154.164	33.32	70.0228	1777.73	61.932	1686.17
F26P92_24hpi_I_bio2	2019	157.694	1708.51	71.1951	186.103	611.147	19.3889	404.379	8187.54	20.3058	25.4355	94.0724	324.982	74.2992	392.628	1136.36	56.0875		22.171	103.225	145.997		18.055	177.559	8.96087	15.0776	92.2441	65.2992	106.677	17.9927	277.475	19.4559	15.546	113.904	1131.05	45.8921	1178.13	460.173		94.6938	841.761	46.7154		19.1323		17.8578	314.924	16.4655	386.484
F26P92_24hpi_I_bio3	2019	167.664	2660.12	69.649	264.135	502.798	19.2439	487.842	10215.1	247.76	14.4024	93.1802	496.746	155.718	810.784	1179.25	95.4559	17.2247	65.7204	208.646	240.799	24.0573	20.5591	185.852	95.3982	19.7831	96.8515	429.526	105.693	23.5089	457.968	28.1574	17.1715	97.0057	447.031	58.5723	901.953	893.509		657.35	1587.95	51.6002		97.3929	10.7259	52.6702	690.117	30.6359	682.149
F26P92_48hpi_I_bio1	2019	189.443	2216.81	130.825	224.108	567.667	27.0936	473.24	10261.7	37.7028	40.2055	79.6474	593.375	94.5104	542.403	1157.41	83.6586	2.01855	44.5953	188.009	190.142		22.3276	265.86	27.1811	38.6709	91.9638	204.727	125.943	16.7564	278.549	20.8375	26.3775	101.81	1755.11	84.3226	1650	873.193		357.307	1901.44	64.9732		52.8114		33.503	771.683	22.1137	749.111
F26P92_48hpi_I_bio2	2019	286.19	2781.73	292.256	617.327	700.453	47.4456	1493.9	23086.9	122.967	60.8631	84.2726	82.9528	78.5724	541.461	1201.92	96.0625	13.9969	29.4312	204.67	61.9374		16.8554	119.86	24.9767	12.7299	48.4909	203.055	32.7649	29.0018	82.3138	25.7593	53.575	131.809	99.3231	41.584	932.058	453.283		333.117	312.073	86.665		68.3808		7.2472	241.866	49.061	190.81
F26P92_48hpi_I_bio3	2019	223.238	3596.51	329.589	381.332	961.387	79.1683	773.014		65.1567	105.539	81.1676	854.832	87.7586	483.742	1225.49	138.366	8.27534	66.1518	271.056	224.026		45.3706	188.275	61.1553	50.0308	106.667	440.332	145.354	27.4967	374.397	30.51	61.096	199.35	789.962	57.6822	1467.59	1326.89		643.364	356.676	90.1899		111.739	7.7731	49.3988	217.486	21.69	338.778
F26P92_72hpi_I_bio1	2019	411.154	3873.02	431.355	446.455	658.93	58.8082	1367.71	28116.3	68.7352	70.813	89.2558	65.3422	76.3975	526.135	1106.19	156.252	67.5815	42.5666	348.554	84.2417	26.6864	23.0822	96.8544	24.4721	11.0085	55.3783	182.754	27.7579	20.7782	109.19	53.8948	41.3986	124.095	142.027	54.3953	607.932	650.811		283.346	602.194	83.3722		68.7152		99.6984	327.444	13.7996	175.258
F26P92_72hpi_I_bio2	2019	494.29	9867.58	61.8176	652.989	518.549	40.9871	2571.08	55140.3	67.876	72.1742	90.9261	62.067	190.942	1162.29	992.063	162.483	40.7901	19.9046	280.107	186.221	18.2518	12.6993	240.623	32.3548	19.1238	126.944	795.842	199.285	82.4648	339.556	33.7592	33.5943	115.981	454.772	286.972	2353.47	799.701		1506.65	231.34	43.6855		155.745		18.4621	374.393	39.6959	306.216
F26P92_72hpi_I_bio3	2019	165.56	2045.57	178.8	514.973	2622.95	28.6559	931.686	16124.9	62.3308	29.7533	59.8049	88.492	126.277	679.886	1116.07	110.376		32.8753	162.343	90.2758		43.8256	134.29	42.8753	22.3932	52.0117	251.177	39.4126	14.7435	60.3979	24.236	57.6569	342.409	382.182	57.4549	1142.85	104.984		457.364	1491.72	99.484		108.276		6.54458	662.401	15.4636	346.126
F26P92_0hpi_NI_bio1+2+3	2019	124.93	2994.38	304.718	693.287	2585.39	47.5031	1099.48	21068.1	20.2151	46.91	157.404	121.143	116.852	694.27	1250	86.7711	31.8548	41.0268	125.561	102.997		36.9735	147.261	28.4276	25.1848	65.5707	192.693	47.5528	30.1055	93.9495	16.6479	44.1279	319.649	1794.71	81.5345	1308.69	87.2012		301.1	1106.74	94.4979		69.404		14.9433	463.396	21.2905	447.789
F26P92_8hpi_NI_bio1	2019	987.347	3301.35	443.69	912.217	6702.42	95.4194	1196.62	21752.3	29.5761	114.811	215.817	107.413	260.088	1381.03	1033.06	279.768		108.767	392.786	309.78		79.7413	216.694	122.472	49.1586	268.903	445.551	1335.88		256.721	137.801	106.204	632.277	449.848	148.684	893.836	215.257		1003.17	1569.87	184.454		426.366		108.096	845.031		644.934
F26P92_8hpi_NI_bio2	2019	418.917	2385.97	332.616	681.993	2315.21	44.341	957.843	17716.6	199.776	39.2951	190.74	177.336	100.248	558.913	1225.49	195.345	5.88811	84.2757	310.564	108.502		31.0349	128.783	89.1138	28.4502	76.2726	327.891	51.0478	30.6057	129.632	48.729	48.394	309.527	961.45	133.1	573.932	86.5919		581.352	479.167	141.88		179.837		33.3098	377.797	22.1475	297.856
F26P92_8hpi_NI_bio3	2019	388.244	2636.8	252.5	580.521	489.4	57.1367	1499.23	33093.9	71.7342	55.4719	272.121	83.2393	73.2932	475.037	968.992	221.542	18.2311	69.3675	253.263	65.3904	116.359	6.98994	146.65	62.555	51.111	54.7954	307.456	65.1042	70.5843	110.149	27.3395	31.4476	105.889	1527.82	211.756	538.119	72.8078		548.211	296.008	179.876		179.906		25.2352	217.129	28.1658	127.823
F26P92_12hpi_NI_bio1	2019	134.444	1575.32	280.446	358.194	1074.96	33.5246	705.413	14281.5	134.328	29.1573	338.449	66.4371	62.1013	354.724	1190.48	95.8221	9.53221	41.0414	151.055	79.315		14.2834	93.4136	40.6967	16.0427	45.4274	156.102	25.247	34.4033	74.752	22.3897	33.5423	147.548	550.209	156.616	523.964	57.1746		234.42	244.729	133.747		81.1203		19.1936	128.078	10.1949	78.4013
F26P92_12hpi_NI_bio2	2019	432.118	2866.52	391.647	634.853	2549.11	43.8356	1099.93	20289.2	17.9464	41.0514	261.068	52.6658	117.516	636.745	1225.49	152.066	57.5497	67.5087	209.182	190.912		36.1582	138.338	53.6119	18.6588	104.386	278.689	52.2427	32.7836	156.433	34.1694	56.0265	319.863	684.391	158.98	1183.06	147.088		476.154	572.739	262.747		132.847		20.4769	355.07	17.9947	260.238
F26P92_12hpi_NI_bio3	2019	240.056	1509.57	176.5	408.92	1485.99	23.7115	631.981	11339.3	16.8508	23.2067	70.1078	27.5403	65.9001	370.679	1146.79	108.56	21.4102	39.8015	136.182	125.277		25.3544	69.6548	52.0703	12.7127	60.8817	241.044	34.0965	11.3643	158.793	22.4843	43.0691	200.148	1040.74	51.0437	526.98	79.6163		432.343	261.203	93.3946		122.882		20.5815	165.335	9.28274	73.2685
F26P92_24hpi_NI_bio1	2019	437.907	2327.81	389.861	489.18	1125.04	42.9447	1012.11	20304.8	317.227	41.0061	314.616	90.6607	81.1937	468.308	1068.38	130.49	9.21134	45.8413	215.869	155.247		20.3081	137.452	69.987	18.0739	88.5575	240.318	35.8876	40.1883	87.647	37.8699	46.2609	181.933	305.764	133.184	857.129	62.6788		387.761	427.41	280.163		155.728		17.7694	219.665		127.584
F26P92_24hpi_NI_bio2	2019	234.68	2614.08	313.082	586.871	1538.97	42.6132	888.64	16576.9	293.376	39.4566	141.213	123.992	85.7282	479.588	1237.62	160.083	14.3123	54.1904	218.854	109.473		28.6817	105.77	64.0267	23.8823	76.8738	282.083	57.3313	20.3061	103.436	32.456	48.6125	239.793	957.391	114.909	777.642	101.519		464.296	348.259	147.219		125.441		18.0092	195.516	13.5798	117.515
F26P92_24hpi_NI_bio3	2019	444.687	3504.65	547.318	1266.57	1547.69	155.577	2796.87		2.09115	199.015	105.552	38.9777	228.294	1431.59	1213.59	180.057	890.633	282.459	412.441	65.3469	279.417	1024.44	282.298	31.0004	34.0921	49.1504	359.902	33.1789		169.332	40.0861	96.7032	267.544	126.429	61.0703	1707.85	371.078		556.269	379.242	154.185		96.5768		338.044	127.78	34.6292	152.278
F26P92_48hpi_NI_bio1	2019	359.242	3909.49	443.894	676.244	1297.57	152.952	1522.6	31745.2	8.83229	259.756	101.284	70.6532	298.317	1697.59	1126.13	214.318	678.858	328.27	464.957	148.047	445.924	1357.13	415.197	83.6004	65.947	65.4431	591.276	65.8341		174.688	42.1453	53.4585	294.818	2250.21	84.4947	2160.75	740.174		870.852	1555.6	565.864		244.41		295.831	1074.18	46.5916	857.982
F26P92_48hpi_NI_bio2	2019	407.966	1792.48	258.184	459.955	2189.11	27.2807	759.297	13937.8	7.60965	127.062	132.784	40.7096	94.1831	545.826	1250	123.912	1.98735	51.7479	225.947	64.003		44.7286	79.6778	51.4355	11.056	42.0713	220.718	28.5598	18.5507	56.0452	45.3631	50.2938	264.66	47.3373	69.2032	237.592	58.3713		388.921	339.196	179.713		116.544		18.4791	175.799	12.3684	132.133
F26P92_48hpi_NI_bio3	2019	565.722	3338.17	682.54	985.727	4434.91	87.3473	1588.62	27168.7	352.604	79.2117	266.611	547.748	188.471	1025.46	1213.59	178.49	22.5734	57.6001	268.295	76.3785	45.7877	100.068	207.36	76.081	49.6994	55.8248	373.479	40.7947	60.6667	60.0034	53.2974	100.558	561.982	253.732	146.921	1058.08	88.6409		568.872	280.131	1046.77		212.584		28.6073	204.631	23.6555	211.003
F26P92_72hpi_NI_bio1	2019	150.892	1010.87	76.527	148.923	518.237	9.31224	288.247	6041.83	216.004	147.944	35.5076	125.859	48.865	305.437	932.836	65.4294	2.78236	20.3198	129.415	51.8791		34.5645	44.8673	31.7053	5.35946	27.5744	132.85	17.7858	6.12174	36.1652	23.5966	18.504	78.4596	62.6049	30.6224	153.422	48.2965		275.49	460.388	37.3196		55.7221		48.6844	225.348		342.739
F26P92_72hpi_NI_bio2	2019	304.076	1653.76	305.805	486.381	1913.93	35.7603	865.847	16212.2	199.703	42.3718	201.644	167.521	85.4996	500.105	1077.59	92.0356		36.4417	198.1	72.9139		46.3244	110.114	41.6584	15.0646	44.6581	175.378	29.327	27.78	46.961	35.37	46.2443	227.867	158.423	110.069	767.618	37.6189		309.908	733.986	176.859		112.127		30.1912	366.276	15.7285	397.724
F26P92_72hpi_NI_bio3	2019	300.887	3227.74	442.438	776.718	827.882	167.174	1990.2	39321.1	3.55596	216.642	158.271	42.5815	118.191	733.4	1237.62	145.497	305.255	381.297	330.994	81.2683	119.049	1026.86	175.039	35.2083	50.424	50.4837	274.199	38.431	57.9582	153.303	26.9778	34.201	149.937	283.919	89.9459	1712.52	1050.51		359.81	1544.52	122.817		81.1641		304.738	505.012	30.536	485.066
F13P71_0hpi_I_bio1+2+3	2019	109.938	922.496	113.801	272.507	1724.39	14.3754	440.792	8208.13	70.3599	86.6916	108.29	108.191	62.9091	360.29	1250	52.9304	4.82619	29.8613	81.9289	49.0886		33.2208	74.974	19.8341	9.05458	32.1528	91.6713	20.7559	12.399	33.1336	14.2663	23.0278	170.909	89.5353	54.8296	295.807	53.1704		169.252	185.407	71.7592		37.6131		19.2695	78.6228	14.4201	52.6278
F13P71_8hpi_I_bio1	2019	278.593	1962.17	295.203	514.202	2553.26	31.4603	825.894	14581.3	159.94	172.704	270.419	98.2099	103.007	572.13	1201.92	99.3005		55.4874	202.212	81.626		42.7771	119.029	49.4211	20.6719	52.4827	206.94	30.2689	33.3196	51.1247	35.4558	37.9405	318.132	168.54	105.088	719.068	77.1411		327.437	433.989	235.892		97.5506		9.68268	176.413	14.6857	142.751
F13P71_8hpi_I_bio2	2019	273.278	2312.43	408.295	681.269	1984.01	44.2962	1082.43	19208.6	577.577	267.082	315.234	108.35	101.92	621.19	1086.96	138.251	12.0762	60.2072	239.435	104.814		72.2789	113.456	70.4807	22.1578	61.8988	261.715	34.3429	45.4057	75.2707	38.4771	69.2511	303.239	91.3143	171.051	406.327	105.758		397.677	297.236	273.846		141.706		18.2676	149.816	21.8098	99.1122
F13P71_8hpi_I_bio3	2019	242.784	1568.67	300.958	503.798	2122.04	34.8934	846.738	15601.1	324.588	35.7121	208.667	104.27	106.305	627.929	1213.59	108.678		47.8314	216.731	92.9424		53.1995	99.1501	59.6684	15.0212	54.3427	261.167	32.6226	28.7041	54.6474	43.8127	46.4821	270.884	119.264	98.7199	559.219	44.9207		489.427	493.541	166.487		140.174		13.6835	227.817	14.8689	173.105
F13P71_12hpi_I_bio1	2019	226.618	2990.65	193.048	933.922	715.297	76.1031	2067.83		3.96442	118.168	65.6843	30.187	145.454	885.13	1213.59	115.882	291.073	260.295	281.23	81.5023	84.3322	1737.64	195.012	19.7919	13.0014	40.67	268.675	25.4296	19.513	109.751	25.4074	33.981	109.672	102.284	40.327	1985.67	282.954		352.235	90.5291	37.6809		46.5544		115.106	55.7598	13.9756	59.8636
F13P71_12hpi_I_bio2	2019	279.357	3841.07	727.294	933.136	3677.94	85.4458	1420.86	25078.2	234.234	74.875	369.541	158.291	168.294	936.381	1237.62	220.964	30.2614	80.4717	340.89	88.8763	67.6546	102.472	201.081	73.97	67.9546	70.435	385.978	51.4493	73.3729	85.1219	45.7209	86.616	516.035	648.927	205.633	1163.99	101.392		599.128	439.839	434.47		182.139		9.48246	248.237		146.114
F13P71_12hpi_I_bio3	2019	244.336	3469.19	624.165	774.051	4305.05	94.4788	1355.23	23874.1	39.7104	105.291	128.015	63.7046	174.722	953.826	1179.25	233.254	9.69849	54.6893	343.381	218.597		85.34	179.631	94.0707	48.6881	52.8803	434.781	36.9794	43.7804	42.2359	51.1524	93.8729	479.484	101.874	105.273	465.82	31.6105		754.755	2051.97	344.322		347.791		19.5035	1103.47	27.7468	1137.11
F13P71_24hpi_I_bio1	2019	128.72	1368.2	216.702	320.058	1290.21	27.2885	552.544	10864.7	98.5553	254.417	139.328	107.336	81.7747	415.145	1059.32	103.545	14.564	55.752	168.85	85.0896		62.7269	93.4342	34.4649	17.6693	65.2827	137.259	30.5189	21.871	69.4781	35.6991	34.2428	177.452	55.8273	73.4564	517.011	100.657		226.88	380.127	139.456		67.4534		7.62242	170.222	38.8174	330.031
F13P71_24hpi_I_bio2	2019	460.522	2399.44	325.754	725.667	4619.48	36.4248	1004.4	17901.7	178.318	43.6765	136.248	77.1562	149.609	850.018	1077.59	100.053		45.279	179.371	172.948		44.821	108.457	36.7052	45.259	63.636	193.044	30.6146	30.9518	32.9026	26.7758	48.2033	425.171	109.519	94.7927	382.833	42.548		325.882	1853.22	189.925		108.642		8.61694	859.78		767.859
F13P71_24hpi_I_bio3	2019	94.8365	2565.46	134.735	283.436	843.855	26.1349	584.657		22.2963	29.0595	82.9524	62.0618	118.793	755.56	1225.49	131.258	38.1763	39.8379	315.977	83.4518	23.0172	32.8476	120.216	102.021	14.233	58.5594	416.884	60.9977	27.7712	165.571	50.1241	28.957	139.128	241.557	71.6135	407.29	492.377		611.223	1400.73	91.7134		181.857		19.0924	657.617	11.9172	580.967
F13P71_48hpi_I_bio1	2019	130.001	2702.26	543.496	883.499	3943.8	70.2311	1444.79	25987.6	73.7568	93.7113	277.454	109.328	163.243	876.445	1213.59	338.471	26.0181	136.288	465.551	165.075		138.797	165.504	130.857	55.3527	70.9108	631.155	51.0384	59.7971	117.915	66.9466	106.284	478.637	296.822	181.3	171.424	48.8697		1034.13	1505.23	334.942		363.22		85.5189	1031.3	26.2402	1296.1
F13P71_48hpi_I_bio2	2019	148.994	4317.31	343.69	608.077	1301.04	92.2104	1186.55		227.432	129.57	86.6204	99.8818	87.1141	614.567	1250	95.3096	79.7	67.3803	247.448	148.936	76.5526	27.0485	211.633	42.2631	26.4162	54.5575	353.071	38.7577	32.2505	203.018	24.3238	54.2083	214.72	629.068	74.3262	1945.6	954.165		636.39	1769.11	86.0896		112.287		30.8563	889.909		636.909
F13P71_48hpi_I_bio3	2019	237.774	2593.56	185.858	614.22	4167.93	32.3974	906.454		118.811	37.9614	35.7618	80.759	152.003	922.81	1179.25	108.271	4.72963	29.0859	203.977	197.691		87.4927	125.654	59.7086	25.3609	41.0227	336.419	24.8253	19.6722	31.3384	29.9658	43.1242	415.555	84.1097	29.6018	73.1331	32.3733		652.454	73.7999	80.8941		136.255		9.37865	68.4421		57.1963
F13P71_72hpi_I_bio1	2019	157.492	4234.75	598.24	934.25	2546.28	72.943	1561.99	29221.1	217.543	83.6706	243.309	132.43	138.1	828.816	1225.49	307.716	15.07	112.111	542.501	206.724		87.6882	186.227	186.362	24.1344	76.5081	668.927	55.4398	36.1541	101.542	96.1341	125.052	406.933	51.2258	167.694	149.938	27.1075		1015.69	3421.77	434.401		497.956		43.5355	1456.05	115.049	1767.84
F13P71_72hpi_I_bio2	2019	223.655	3118.31	473.823	439.654	902.472	92.4952	973.7	19192.3	125.2	104.109	121.855	88.9945	123.414	822.777	1068.38	180.942	106.439	51.6482	409.989	127.672	141.648	31.785	237.712	72.0462	20.8643	56.5762	450.857	38.5289	33.0457	194.428	58.3327	64.9452	178.678	233.9	111.64	1427.33	878.167		672.132	321.396	208.172		213.469		27.1736	356.481	19.868	199.211
F13P71_72hpi_I_bio3	2019	293.767	3069.25	385.294	871.659	4761.61	47.3129	1345.65	23272.6	164.536	61.4858	109.578	51.7437	174.856	922.345	1225.49	143.781	73.9333	33.5471	179.433	225.211		172.286	95.4673	43.06	25.5122	59.7742	266.333	40.5044	27.3539	49.2898	32.8613	87.7046	496.197	221.456	66.2167	147.902	39.8425		506.077	142.317	154.012		124.768		24.1431	134.5	14.9181	110.441
F13P71_96hpi_I_bio1	2019	377.175	5177.85	581.912	757.789	911.572	105.406	1923.76		6.06248	144.275	116.145	201.333	195.133	1314.07	1179.25	238.197	27.3494	70.4385	486.798	97.3807	24.5537	41.2637	210.795	49.0627	21.0765	75.5818	436.127	48.3493	60.9904	201.558	68.5909	112.067	198.641	104.585	84.9778	1600.2	1450.36		711.216	780.137	246.199		160.167		173.965	477.081	27.8613	269.257
F13P71_96hpi_I_bio2	2019	391.025	3075.3	327.76	791.726	3420.69	43.5396	1281.81	23363.1	119.681	44.6951	103.599	48.5503	131.231	751.782	1096.49	143.338	174.25	37.3685	188.223	115.256		203.607	113.823	64.6099	30.5346	54.5393	304.67	28.62	73.2643	57.4019	31.834	66.654	377.401	1053.21	68.8904	348.833	53.4986		579.76	1021.62	241.833		197.417		47.8276	413.334		531.276
F13P71_96hpi_I_bio3	2019	197.77	2106.4	283.057	567.685	3087.96	30.9605	938.784	17738.8	107.9	36.6721	203.896	47.2721	105.124	672.214	1201.92	91.9336	3.5528	33.062	200.372	118.168		59.0258	85.9212	59.1043	25.7699	52.5416	235.845	32.3648	33.6492	41.1017	27.9593	51.5873	327.599	78.4455	121.352	161.988	45.943		415.854	950.348	251.226		154.455		4.03292	376.289	14.7644	393.092
F13P71_120hpi_I_bio1	2019	361.94	2124.83	370.483	665.533	4118.42	44.1631	921.837	16455.1	267.897	56.4827	105.125	84.3314	128.534	813.427	992.063	118.763	2.1258	32.966	303.195	86.2865		39.4422	98.3965	78.6327	43.0319	49.9686	338.922	39.3108	39.3371	38.6131	44.147	64.513	381.21	22.7618	142.754	187.214	43.0732		596.201	134.941	470.545		306.91		10.1488	119.285		78.4941
F13P71_120hpi_I_bio2	2019	220.678	2268.95	166.432	246.577	616.842	31.2093	664.556		26.2258	44.1901	56.4553	81.721	63.5049	446.732	1168.22	105.998	90.6011	44.3534	249.952	80.3019	49.071	24.2199	93.5311	51.6461	20.9277	52.3908	283.922	46.1395	12.5334	206.039	29.2418	23.4292	111.007	120.993	42.2875	458.431	838.261		474.005	228.095	48.4081		95.3008		142.227	245.032		94.7429
F13P71_120hpi_I_bio3	2019	168.02	1972.29	249.447	460.932	3628.27	26.0093	808.124		110.938	31.7615	124.645	31.0527	126.34	760.886	1008.06	55.8635	3.21396	21.213	118.228	71.0788		38.2482	69.6446	25.6735	33.303	44.2374	122.478	26.1856	26.5485	21.4537	22.1436	42.8848	331.14	21.8015	76.127	128.639	22.6258		193.332	342.425	251.421		89.3124		3.96247	319.076	10.2083	375.124
F13P71_0hpi_NI_bio1+2+3	2019	2217.84														1225.49
F13P71_8hpi_NI_bio1	2019	274.792	3570	354.793	852.139	983.653	97.0354	2050.45	41156.9	1.91391	119.312	113.558	43.336	304.236	1586.14	1213.59	174.113	495.295	538.948	358.284	81.3258	121.669	858.998	252.095	47.8858	19.4074	52.8104	315.436	33.0467	44.2632	128.34	49.6385	47.1232	171.268	175.53	68.3936	1504.67	254.084		475.602	793.928	275.389		103.717		345.619	423.006	19.5434	474.011
F13P71_8hpi_NI_bio2	2019	94.6896	3.70369				0.0857011		12.5933			13.3924				1213.59	3.75372			0.481186	114.145		7.53309	13.846		1.53523	54.7352		19.0203	5.29007		8.06972	6.02838	4.89619	4.80716	19.5499	2.41016	1.16743		0.459133	264.214	9.19481					170.012		267.333
F13P71_8hpi_NI_bio3	2019	117.417	2140.54	250.255	398.599	2098.29	32.6398	629.567	12353.7	103.42	37.0713	74.4108	62.3893	74.3046	498.935	1201.92	140.693	2.71475	44.4283	233.448	127.001		52.312	93.7252	76.5132	26.3227	56.8189	289.279	32.6389	21.131	69.445	35.5653	54.1936	222.94	100.844	65.2837	305.636	76.5275		505.043	407.682	131.999		182.127		24.2958	181.315	21.5467	144.016
F13P71_12hpi_NI_bio1	2019	308.437	3151.44	372.629	774.484	854.346	110.03	2006.26	38882.6	10.844	166.466	150.355	48.0053	112.852	704.029	1289.99	113.567	571.6	310.245	294.884	65.8215	223.493	1531.06	165.871	24.4491	41.8859	78.248	209.859	28.9247	41.8097	169.212	28.4224	34.9823	142.747	266.321	79.2205	1727.06	623.253		266.19	216.166	85.8251		47.4007		186.181	141.464	31.8538	95.5851
F13P71_12hpi_NI_bio2	2019	1976.05									68.1862				64.4046	1190.48													975.579					47.4302					519.912				602659		106.982
F13P71_12hpi_NI_bio3	2019	241.165	2520.81	392.511	785.277	745.243	109.293	2194.09	41549.3	14.8426	159.485	239.874	32.0312	141.798	848.928	1201.92	159.355	440.118	250.606	388.333	70.6962	103.644	899.498	168.776	21.7834	19.2147	40.8696	226.042	25.5652	44.5884	125.524	41.2996	33.8327	133.166	194.127	141.687	1611.02	246.582		329.844	659.915	100.277		61.3655		121.454	180.714		165.709
F13P71_24hpi_NI_bio1	2019	255.014	4046.82	349.774	975.927	1259.62	105.11	2639.19		17.1522	145.121	96.8631	53.7773	264.711	1555.92	1278.12	178.364	528.151	712.487	392.037	77.7836	153.717	1104.05	227.218	27.6715	17.84	54.4786	253.17	41.6164	39.203	123.717	47.3859	39.1817	234.179	101.881	52.4109	1709.67	505.772		364.858	1086.45	129.641		58.3511		616.76	512.556	38.4628	586.065
F13P71_24hpi_NI_bio2	2019	235.127	2328.13	256.523	557.254	2074.61	26.6263	875.791	16973.3	189.575	26.5079	96.824	208.419	87.2119	636.763	1096.49	73.8521		49.8082	143.54	79.0594		40.9218	69.7379	42.4236	13.7205	42.6967	219.442	24.0929	18.1044	44.099	21.0351	40.3444	267.492	79.4245	44.1438	206.851	36.3984		421.193	104.258	101.105		79.096		3.82185	58.486		27.1089
F13P71_24hpi_NI_bio3	2019	314.737	1549.96	181.745	311.27	1178.14	30.9283	551.084	11873.8	9.41412	45.1593	66.2861	124.653	114.921	800.445	1237.62	106.932		32.593	160.132	111.84		42.935	136.206	24.4928	27.0667	68.9756	156.725	45.2931	25.846	60.6982	31.815	23.5456	142.156	509.774	41.7853	1152.71	190.908		256.571	328.222	51.141		58.193	2.44331	3.48064	201.226	20.6303	269.017
F13P71_48hpi_NI_bio1	2019	11794.8			15062.2						426.597				326.789	1190.48													4175.1	1016.64				201.223					3859.7				2.73239e+06		508.326
F13P71_48hpi_NI_bio2	2019	482.352	3479.25	559.846	991.678	4293.43	55.9952	1344.17	23882.7	231.184	52.8186	339.56	229.67	160.967	1231.44	1086.96	163.862		82.2068	290.241	87.9386		81.4711	159.882	113.591	27.4369	94.7787	436.888	36.9697	32.2548	74.4425	50.6027	58.3709	505.359	183.245	128.927	305.577	59.1641		706.319	509.888	231.531		254.728			211.618	46.5894	391.354
F13P71_48hpi_NI_bio3	2019	166.677	3478.98	93.9409	395.881	863.079	34.2156	891.32		16.1425	52.494	40.0453	400.057	170.652	959.851	1126.13	76.4058		35.5296	169.618	269.287		31.983	259.377	39.6073	38.1062	90.5823	290.899	102.732	17.1803	414.765	19.5035	43.5607	161.364	2463.21	42.5006	1906.33	1032.27		474.417	113.208	54.0338		75.4801	10.3504	18.8773	128.218	18.1316	305.131
F13P71_72hpi_NI_bio1	2019	5120.55			5882.7						171.64					1157.41													2008.37	528.834				76.0757					4418.22				1.22262e+06		415.043
F13P71_72hpi_NI_bio2	2019	6244.73			9793						312.058					1136.36													3523.84					258.091					2670.26				2.72374e+06		209.665
F13P71_72hpi_NI_bio3	2019	179.719	2509.43	179.171	526.697	2685.84	31.0356	789.775	13074.9	154.372	39.1532	74.7584	275.768	112.621	565.966	1342.64	59.308	6.0816	70.3943	114.991	146.424		51.3498	139.506	24.6547	28.0898	79.2179	194.631	77.0678	15.7889	415.338	14.4388	47.5347	394.105	1718.27	49.5267	1489.59	830.939		348.461	403.66	61.3541		45.4552	9.26116	64.1985	245.235	27.3118	282.999
F13P71_96hpi_NI_bio1	2019	199.696	2665.43	277.05	441.255	1587.43	39.8222	857.87	17177	222.924	48.2569	68.598	134.854	95.9267	668.392	1136.36	83.6042		24.5966	145.536	103.251	10.7864	40.8059	158.458	44.1739	57.3949	51.216	242.203	33.2805	24.6435	47.5826	22.4555	38.4816	222.297	401.866	37.3991	1149.79	124.789		391.1	222.113	85.4304		92.796	2.20565	2.8941	109.627	8.44605	81.3727
F13P71_96hpi_NI_bio2	2019	242.051	2402.54	158.511	433.489	1799.47	32.2511	706.823	12564.9	129.618	41.4	99.3489	307.11	91.3416	492.83	1190.48	59.4758		68.507	122.591	127.97		40.3714	112.617	20.4272	19.3405	66.4738	184.87	74.0118	15.2939	447.962	14.6306	44.7709	291.356	550.098	61.5899	1192.22	684.588		329.69	281.39	60.114		44.3324	9.1751	21.671	95.4375	13.5048	72.0144
F13P71_96hpi_NI_bio3	2019	268.562	2163.46	549.62	586.774	1606.09	52.0436	972.08		159.674	48.7568	237.134	108.058	95.2574	794.562	1250	105.149		46.4963	177.612	64.1756		45.7207	113.132	46.9523	12.4063	35.2821	206.758	22.7835	24.5868	41.0103	37.9658	50.4069	243.104	33.81	72.3673	289.421	54.1194		333.082	148.277	133.051		115.746		3.87774	89.8377	11.0536	52.0024
F13P71_120hpi_NI_bio1	2019	297.715	2780.64	580.614	668.001	2417.74	79.6093	1172.44	22795.2	60.3811	80.0481	149.061	264.86	131.674	875.123	1190.48	182.826	13.0004	44.9895	280.155	80.2846	32.0445	67.2172	167.331	77.4954	63.8111	45.4219	384.749	29.8362	46.5225	15.9247	49.1455	84.1993	367.362	123.193	83.352	387.052	62.1166		601.969	274.247	325.36		212.868		9.58467	120.823	19.1026	83.7495
F13P71_120hpi_NI_bio2	2019	263.997	2132.58	621.99	871.77	3422.57	58.3103	1149.48	22322.5	102.235	55.9551	262.467	137.144	123.391	980.486	1168.22	130.211	3.62639	55.115	218.777	66.2425		58.5064	196.399	66.6907	35.9897	54.3061	326.305	42.8229	51.1593	55.6925	35.9287	61.2134	383.822	172.586	118.226	750.081	65.9738		544.6	379.133	414.451		213.438		3.82444	163.676	17.6024	120.843
F13P71_120hpi_NI_bio3	2019	8167.07									232.641					1106.19											114.763		3821.65	884.271				205.332					6016.78				2.8414e+06		399.196
NY42_0hpi_I_bio1+2+3	2019	416.594	2613.5	579.425	435.783	1362.09	47.0606	883.537	17995.8	406.995	41.1015	182.605	122.493	95.0442	693.42	1225.49	204.285	11.8013	39.3124	368.42	73.8516		62.6544	125.87	48.3926	13.4582	36.9247	221.694	25.2532	26.3324	33.2661	65.4513	52.6015	226.979	24.4874	99.6673	160.027	35.5252		297.879	676.702	267.053		131.205		7.88717	304.352	13.2216	363.707
NY42_4hpi_I_bio1	2019	478.265	5072.98	355.079	708.782	2354.34	75.3966	1322.9	23784.7	134.336	113.064	79.1967	558.124	212.077	1102.35	1213.59	165.429	23.6261	88.1419	347.797	259.695	45.0603	82.3437	315.849	60.5847	34.8209	101.968	520.76	133.16	34.9429	871.741	44.3318	105.563	465.25	840.58	68.0172	2277.77	1567.54		893.807	3018.53	210.618		148.056		26.8978	1262.43	38.8622	947.747
NY42_4hpi_I_bio2	2019	259.851	2244.38	400.523	581.885	1151.13	37.4705	1037.82	21929.1	541.901	39.0723	190.762	155.797	82.8781	630.288	1179.25	92.1639	3.86398	40.9585	158.895	67.9468		35.598	114.794	51.0667	13.0892	47.2151	225.374	33.8895	22.03	44.1732	24.3384	54.7918	177.112	55.1233	66.4792	328.933	57.6308		375.428	179.458	117.153		97.9893		5.87576	126.485	13.6387	150.932
NY42_4hpi_I_bio3	2019	95566.5					1472.34									1250			1053.05								1772.37																		2904.02		493.835		2064.84
NY42_8hpi_I_bio1	2019	167.486	6.22951			1.41061			26.6255			4.77697		0.408988	0.482995	1225.49				4.91046	40.8409		1.73675				17.0951		9.01082		4.92485	77.4957		3.5376		8.38899	3.48964	1.88867		0.922648		1.93378			9.5291		36.018		66.9562
NY42_8hpi_I_bio2	2019	154.291	6.10971			1.38349			26.1135			4.68511		0.401123	0.473706	1201.92					40.0555		1.70335				16.7663		8.83753		4.83014	76.0054		3.46957		8.22766	3.42253	1.85235		0.904905					9.34585		35.3254		65.6686
NY42_8hpi_I_bio3	2019	4139.04														1237.62													1908.43	533.204				85.7588					1387.22				1.25702e+06		202.313
NY42_12hpi_I_bio1	2019	292.748	1606.44	304.714	420.358	1122.91	25.2584	710.201	15376.1	527.51	25.025	172.16	168.942	71.9812	556.087	1106.19	97.7936	2.15615	41.3847	157.401	73.9163		28.8248	118.854	41.662	11.2769	45.4513	182.891	36.7898	32.223	57.0566	32.6269	38.058	150.493	83.8829	80.0383	449.588	69.2071		332.911	729.297	125.918		99.2257		28.9433	499.687	19.445	505.254
NY42_12hpi_I_bio2	2019	73913.4	44923.1						55897	973.255		334100	134787			1284.69		17324			472774			538053		620359	12685.1		6646.56			43750.6		1573.04		953386	549685	614051	306.543	269550					6940.51	1662.1	4466.27
NY42_12hpi_I_bio3	2019	4309.52			8220.27						539.183				659.037	1179.25													2436					91.3258					6404.17				1.31152e+06		333.16
NY42_24hpi_I_bio1	2019	70337.4				47817.2										1225.49			1042.36					4626.4	1075.48		1061.61		2691.2					1465.35		8322.1	1106.73	857.771		274.798					1095.06		1083.14		1181.09
NY42_24hpi_I_bio2	2019	120.219	2898.72	339.854	602.355	2225.35	42.2197	930.957	18379.6	503.987	47.508	78.5843	188.008	91.7328	664.039	1106.19	111.937	2.04028	53.0271	180.726	61.7297		38.6169	83.458	65.7555	13.8819	47.7973	324.746	29.0179	12.762	60.1521	21.866	59.3304	243.893	155.218	50.8934	254.452	50.7264		537.656	175.331	80.6327		126.92		15.6889	160.682	8.53452	185.66
NY42_24hpi_I_bio3	2019	250.232	2036.7	381.772	689.185	2481.79	35.1155	1118.1		130.808	36.9515	155.903	54.0597	103.152	850.921	954.198	74.0224	21.5228	31.9466	126.98	51.1388		56.8324	98.5663	34.3623	11.7978	55.074	173.665	24.2752	20.3016	31.1404	23.2112	54.5242	298.52	40.8064	49.5106	172.433	64.9982		281.114	300.726	121.804		80.3023	3.06137		132.792	33.1087	246.728
NY42_48hpi_I_bio1	2019	264.614	2144.54	366.626	619.894	2410.7	40.9052	935.023		185.56	38.0777	186.692	101.472	91.4995	678.644	1126.13	71.1203	2.63357	24.7975	120.347	87.9044		45.795	93.6839	33.3502	20.9325	48.5844	172.456	33.5507	28.0501	30.4989	21.0171	50.1005	263.8	165.327	77.1422	405.451	40.3899		270.482	250.578	109.67		88.8159		3.98634	120.501	9.77298	105.228
NY42_48hpi_I_bio2	2019	169.64	1551.59	432.905	930.552	2685.01	31.9346	1108.23	18502	471.987	30.5621	736.223	70.3405	127.739	1027.65	1250	82.2232	3.03646	41.6752	135.201	70.2669		34.2735		32.325	20.8702	49.8337	148.752	29.5946	50.1093	31.888	26.7472	40.7657	358.454	45.1009	153.681	192.393	23.5934		193.644	222.119	135.41		67.3547	2.3413		116.399	18.9385	90.3271
NY42_48hpi_I_bio3	2019	450.861	4268.59	632.648	573.528	1285.86	101.656	995.136	21766.8	444.023	88.9489	182.496	382.495	86.8693	659.85	1008.06	232.812		114.66	406.777	73.3279		39.3798	172.834	101.223	26.3033	57.7519	345.759	34.1699	21.2201	122.463	53.8919	54.4876	204.916	137.4	83.2864	479.387	213.522		543.174	853.783	160.88		212.102		26.3802	337.491	24.1978	322.497
NY42_72hpi_I_bio1	2019	317.468	2583.9	327.616	554.313	1636.7	43.7903	857.964	17295.3	174.749	41.112	258.209	129.06	77.4655	646.026	1168.22	99.3065		58.0933	161.654	75.2235		35.1825	123.055	30.4923	29.59	61.5066	164.166	39.629	22.0092	71.8566	20.277	39.3431	187.397	545.437	122.754	529.628	292.017		267.36	648.354	56.6427		70.6399		21.6976	391.438	26.6747	303.455
NY42_72hpi_I_bio2	2019	8055.15							25269.7		687.915					1213.59											93.225		3345.86					198.963					2434.39				3.08041e+06		166.975
NY42_72hpi_I_bio3	2019	307.849	1953.51	305.28	676.074	2786.56	42.1702	1151.06	19816.4	25.6692	41.4284	139.654	91.9629	145.004	790.864	1201.92	106.053	3.04705	27.7681	164.196	92.5834		46.7538	105.781	42.6046	28.7219	55.9058	204.923	34.4528	24.8711	34.3639	30.8358	59.3442	427.002	98.9993	59.3041	466.17	59.9857		308.01	397.606	203.756		91.6787		10.6381	166.686	17.55	143.755
NY42_96hpi_I_bio1	2019	151.149	4015	403.495	531.013	2511.94	85.6196	1189.8	20903.9	55.684	107.556	79.5799	165.217	184.57	944.123	1237.62	292.622		69.262	354.067	118.203		101.593	179.821	111.502	46.482	66.5484	560.491	53.6124	25.1285	126.687	57.5583	80.9985	445.096	1663.57	67.9182	1159.32	259.717		812.783	448.182	142.736		233.596		43.4901	212.138	21.0605	215.149
NY42_96hpi_I_bio2	2019	353.921	159.484		26.4245	228.898		217.808	130.031	700.427	699.563	791.736	333.871	220.828	1297.64	1190.48	117.337	60.4997		929.966	1235.87	155.685		2409.95	533.014	2383.8		3733.8	2963.01	1945.16		140.979			4218.3	4323.48	2521.28	2545.81		2741.84				40.3363	2204.77	3341.85			47.131
NY42_96hpi_I_bio3	2019	2815.29									182.532				87.3838	954.198													1329.92	218.721	193.76			51.6395					990.036				767159		122.948
NY42_120hpi_I_bio1	2019	25289.8	573.737					75458			202098	2612.37	125085			1262.63	71440.6				2873.86				199703	434754			3775.49	57054		34001.2				329614	2475.65	2502.27		50554.7				1624.46	3253.77	3476.2	679.572		3922.73
NY42_120hpi_I_bio2	2019	277.369	2151.78	293.688	385.137	1436.15	37.7856	765.982	13902	8.31707	37.6145	70.0614	90.1104	145.859	774.543	1077.59	203.793		39.8588	276.347	84.7498		60.6117	112.272	56.1511	15.9002	46.037	289.47	34.0114	18.1594	63.8793	48.2138	65.0154	256.126	164.988	53.7363	434.477	124.965		514.712	320.92	74.8149		130.754		28.9795	161.845	22.018	120.81
NY42_120hpi_I_bio3	2019	227.587	1.06313					4.41525	2.13724			3.74429	12.969			1086.96					1287.64				2.13605				20.8579		110.572	11.7231			9.10733		1505.58	1583.71		1.45931					31.0865	7.56242	5.16854	59.355	14.1422
NY42_0hpi_NI_bio1+2+3	2019	139.42	5214.28	56.9315	346.858	385.358	17.8883	1026.53	23838.1	193.585	445.864	137.83	128.706	233.222	1159.14	1157.41	93.5209		12.8695	146.443	95.9888		59.7668	143.931	37.9388	16.4296	88.8927	509.21	162.753	53.7608	101.942	24.679	55.4325	123.151	824.948	284.814	1397.73	187.991		992.23	122.089	50.777		83.833		20.1082	110.621	36.2031	144.771
NY42_4hpi_NI_bio1	2019	112.866	1355.1	251.854	505.034	2703.55	24.6266	834.41	13842.3	101.963		159.95	86.6645	108.697	586.832	1237.62	81.8475	3.08499	28.1181	137.053	72.5198		40.6601	64.5588	27.9352	12.3274	44.0636	148.496	23.0016	19.7722	31.3034	25.3333	51.6546	330.814	23.5143	77.455	89.5284	35.1256		233.788	343.35	223.333		67.7566		11.3264	135.717	17.4897	94.9675
NY42_4hpi_NI_bio2	2019	320.94	1258.59	141.334	240.781	741.221	19.7496	480.046	9639.76	106.136		94.3738	123.643	103.31	561.181	1041.67	92.7349		20.0716	160.598	86.9508		25.8488	108.95	23.7483	17.8537	49.9845	109.42	35.406	15.1382	37.6892	37.5618	22.2908	136.562	156.666	51.5965	640.581	115.748		180.858	322.923	76.1361		53.6496		12.1056	127.594		87.4515
NY42_4hpi_NI_bio3	2019	284.741	1549.35	123.42	400.143	2829.32	17.8351	666.596	10773.4	96.0698	102.413	78.3494	97.1081	111.714	565.102	1016.26	47.5451	1.93298	23.8415	68.658	76.8012		42.2549	76.6658	17.9538	8.22281	42.2098	119.735	21.8808	9.46634	27.7685	12.4464	26.4488	323.442	215.806	36.9512	757.914	53.3201		210.206	170.948	73.6357		33.0179		5.67547	164.654		258.045
NY42_8hpi_NI_bio1	2019	178.938	1851.83	163.539	493.426	1494.15	23.8764	908.02	17155.4	292.927	24.095	220.774	277.699	102.161	570.606	1237.62	87.9877	2.36072	31.7698	150.502	89.3939		38.3718	105.274	32.3295	17.3747	62.304	180.986	33.1447	20.7922	45.0629	19.5457	41.1011	224.145	252.699	82.9467	789.972	54.8516		274.285	227.38	108.717		65.0153		28.7437	188.101	18.5234	419.087
NY42_8hpi_NI_bio2	2019	290.915	3210.06	271.33	649.767	1328.95	65.666	1544.21	29680.8	96.1979	85.3615	129.524	211.159	155.405	898.492	1250	157.29	4.43585	44.6109	226.018	94.9536		68.806	247.075	27.1092	19.1621	59.8343	212.848	55.1593	27.7895	64.8379	38.1192	57.5287	239.808	511.792	73.8311	1338.65	126.652		322.077	331.856	82.936	157.744	76.1624		47.6627	188.931	28.3645	96.1641
NY42_8hpi_NI_bio3	2019	227.266	1895.76	330.865	552.705	2272.01	39.0868	940.517	16222.3	540.382	32.0744	160.12	132.306	115.27	626.112	1136.36	107.199	11.9885	33.3618	160.762	85.3443		56.2551	89.715	37.1329	9.32632	46.671	187.763	29.6588	21.4574	37.6315	35.5894	65.4222	341.537	36.8525	68.993	188.846	53.5831		288.604	227.767	298.092		84.9351		19.5127	100.386	12.6042	73.271
NY42_12hpi_NI_bio1	2019	369.09	2496.14	301.174	675.967	3450.52	47.6842	1043.42	16870	69.9747		90.4213	68.3694	147.571	734.215	1096.49	208.511	16.5144	46.8576	251.251	132.634		108.211	108.274	95.7186	30.5392	58.7884	414.382	39.5036	22.1966	71.2371	45.7299	71.725	438.562	272.989	88.3602	536.924	90.9322		675.923	526.923	219.753		225.944		10.8079	245.495	8.86792	215.769
NY42_12hpi_NI_bio2	2019	186.032	1747.34	289.844	202.562	490.199	25.0618	443.681	10034.6	192.369	28.0839	99.4101	141.577	39.4041	272.397	1213.59	118.666		40.9394	378.208	73.9795		25.452	86.3199	29.6096	12.8445	48.0106	144.481	30.1605	23.7213	84.2702	61.2297	32.169	95.878	15.533	67.1739	117.842	64.931		271.257	454.919	78.3274		61.1289		12.5476	214.203	25.1407	187.157
NY42_12hpi_NI_bio3	2019	207.132	2428.97	315.578	185.224	261.399	38.8804	482.005		683.154	43.3009	113.286	184.091	78.7198	533.29	1213.59	260.322		37.8179	543.639	64.9447		37.3399	118.471	49.0333	9.92604	48.7235	236.043	27.1486	17.5083	104.301	105.248	29.713	71.532	15.0364	62.3097	87.0671	78.1633		416.504	403.792	56.2822		90.9515		13.4393	196.559	35.0683	174.307
NY42_24hpi_NI_bio1	2019	298.183	2709.78	367.457	494.084	1235.08	56.5755	901.522		211.987	61.4447	150.924	114.684	75.0073	489.323	1225.49	78.0137		43.3333	230.963	60.0094		39.9403	139.736	38.4417	22.2809	47.6914	226.599	41.013	22.2315	59.3049	21.6612	59.9926	187.321	641.258	84.5128	688.983	70.6182		352.201	493.217	148.178		83.2638		9.20403	344.934	36.1467	227.903
NY42_24hpi_NI_bio2	2019	274.285	2270.67	358.096	327.457	584.317	63.2937	742.58		264.615	63.9457	133.009	943.073	157.652	920.018	1250	247.47		42.995	531.645	81.1658		57.1381	141.528	51.3639	18.591	68.2408	290.584	44.2405	27.8675	92.2975	99.1749	44.609	132.859	348.891	56.9609	597.086	460.047		510.055	565.525	212.283		105.385		11.3007	346.908	46.5919	239.942
NY42_24hpi_NI_bio3	2019	107.967	3098.71	372.244	549.473	1236.86	67.0792	990.696	19783.3	84.9433	83.0688	162.328	92.7906	68.5898	500.21	1168.22	122.796	29.5607	60.9133	339.791	149.386	27.9552	23.6321	110.287	76.8101	22.7684	63.1519	328.268	51.8454	40.0327	270.962	34.6085	55.892	202.334	137.071	115.886	929.377	980.906		516.358	445.995	205.022		171.773		30.0042	294.657	13.563	127.863
NY42_48hpi_NI_bio1	2019	221.094	5007.56	259.587	701.151	3896.22	44.5194	1446.4	26463.9	37.5236	50.6016	122.916	81.731	148.445	840.679	1213.59	118.708	112.995	56.1665	255.715	131.132	78.4651	51.4919	77.3235	62.4577	24.6494	58.3761	295.272	45.6185	22.3607	214.437	29.6801	49.8647	500.125	135.468	116.259	356.845	785.775		523.774	328.233	78.3881		130.356		47.6351	135.027	22.4689	116.98
NY42_48hpi_NI_bio2	2019	149.63	3256.42	339.534	332.111	865.886	62.6564	813.14		60.3268	60.3214	65.1085	108.725	66.4921	443.948	1190.48	163.705	315.161	66.7651	327.745	82.7812	186.471	29.6219	149.57	81.004	22.5408	62.7086	384.702	47.7277	94.5049	226.195	33.9076	147.555	157.193	138.27	68.3153	724.297	1009.99		548.459	545.889	146.782		193.056		163.615	292.538	25.2338	194.554
NY42_48hpi_NI_bio3	2019	177.09	3458.07	411.495	440.208	897.565	62.0336	921.253		174.753	77.2846	145.206	168.599	75.0589	455.912	1033.06	136.608	25.3108	75.6609	266.029	147.152	24.297	29.9147	209.669	63.6263	27.6774	58.8537	379.646	42.7121	37.4903	161.147	31.3217	60.291	191.113	594.498	123.285	1487.88	958.094		543.241	222.415	148.83		114.401		30.8386	123.307	14.2481	75.1848
NY42_72hpi_NI_bio1	2019	330.501	3749.55	391.944	454.532	630.88	66.381	1335.05	28433.9	8.37636	102.453	217.616	110.792	147.817	918.891	1068.38	308.426	217.561	139.613	592.108	229.582	142.83	38.1274	402.217	140.097	27.9329	97.7639	682.977	93.3577	72.561	280.404	83.9649	135.195	167.764	434.588	282.553	2112.68	1514.31		1066.94	699.96	452.804		368.13		188.624	422.455	36.2542	425.869
NY42_72hpi_NI_bio2	2019	277.792	1771.76	161.537	308.991	1331.31	21.9514	605.462	11967.6	9.08185	30.8529	134.329	28.7578	61.5597	353.151	1116.07	91.3512	24.1802	48.0422	194.862	115.273	19.2628	26.7757	66.0061	49.8699	24.7951	57.3604	223.613	39.216	30.8085	150.4	25.9701	25.8486	174.061	118.868	114.295	263.882	607.647		407.84	614.5	47.7577		100.017		32.9474	225.796	28.0356	265.702
NY42_72hpi_NI_bio3	2019	411.896	4555.95	331.365	534.579	641.946	71.9747	1607.86	33754.3	98.9235	107.825	118.626	181.549	133.42	811.959	1096.49	213.089	99.6408	67.3862	422.02	122.356	29.103	24.8487	173.728	53.6763	17.9665	75.4229	347.012	60.3814	30.0339	201.428	52.7258	60.9004	130.304	131.236	99.8662	1077.04	1217.75		588.478	387.06	78.1327		126.235		137.68	177.202	35.3752	161.359
NY42_96hpi_NI_bio1	2019	156.598	3836.96	438.939	371.557	1034.23	70.7675	890.925	17056	60.2975	77.4859	127.064	118.961	77.4426	451.894	1225.49	191.343	14.1057	57.7933	417.188	107.189		30.326	124.338	59.4667	30.6859	77.3294	319.557	73.2507	28.7876	244.075	58.0741	41.2109	195.99	145.82	129.289	676.952	1017.1		500.987	267.034	191.774		126.443		31.8669	104.327	14.5609	101.95
NY42_96hpi_NI_bio2	2019	209.888	5244.43	382.472	800.136	2050.87	64.8835	1652.35	31339.8	33.7454	99.1991	118.222	156.614	135.313	769.198	1136.36	114.95	14.0926	79.0702	242.682	241.174		42.4406	264.719	56.1558	24.2639	69.0969	400.951	60.3607	34.1122	188.245	30.4836	93.7105	363.866	731.725	117.039	2268.17	867.829		726.802	851.749	135.226		120.459		122.902	527.125	24.2241	544.462
NY42_96hpi_NI_bio3	2019	315.81	4417.47	562.118	833.152	1979.13	74.8539	1448.55	26484.4	115.509	102.062	137.199	132.129	113.178	691.72	1250	153.096	141.998	52.2261	300.355	159.301	162.431	31.0253	256.938	59.5818	33.1752	81.4662	396.678	57.5632	95.1482	258.717	42.7102	115.656	334.621	278.578	119.221	1876.89	966.577		706.941	300.48	335.203		210.59		39.3204	352.876	15.7597	265.207
NY42_120hpi_NI_bio1	2019	369.447	3270.24	262.19	472.833	941.468	44.828	1117.27	22179.7	20.3054	70.5458	101.314	214.366	83.9778	490.267	1237.62	104.517	13.8008	64.4836	217.282	256.621		29.4749	217.203	54.8226	69.7382	85.6091	317.971	69.9453	51.3065	153.449	29.9497	76.2777	180.046	1627.81	82.6403	1786.66	1432.98		581.55	324.439	102.417		111.321		82.4581	379.956	18.2946	742.44
NY42_120hpi_NI_bio2	2019	591.08	4576.78	618.24	878.139	2062.58	152.424	1814.05		979.11	119.844	294.573	287.195	727.567	2905.54	1201.92	541.939		117.488	996.707	138.19		101.341	409.59	480.342	40.192	88.7879	1763.95	58.4966	62.5581	170.495	236.058	134.591	555.647	222.299	167.577	669.794	345.661		1768.41	2832.48	524.13		754.179		26.5786	1080.73	51.7403	1081.06
NY42_120hpi_NI_bio3	2019	208.814	3995.51	407.139	591.357	1987.25	46.9234	1041.38		96.9804	53.9663	88.6173	70.8654	89.5266	604.032	1190.48	99.2291	45.4929	49.6817	241.413	91.7738		46.8546	94.5697	51.8592	25.7633	70.063	339.541	71.6671	31.7026	259.007	32.1251	68.8964	334.915	51.0893	469.689	352.691	913.35		563.677	1279.84	140.805		105.161		20.3161	744.894	10.697	565.83
[truncated: 8 more columns]
