# Supplementary material for: Secondary and primary metabolites reveal putative resistance-associated biomarkers against Erysiphe necator in resistant grapevine genotypes
Source: Front Plant Sci. 2023 Jan 31;14:1112157. doi: 10.3389/fpls.2023.1112157 (PMC9927228; doi:10.3389/fpls.2023.1112157)
Supplement: Supplementary file 6 [file DataSheet_6.xlsx]

## Sheet: 24hpi
Table 6. The Cohen d effect size and p values of the identified upregulated metabolites for the studied genotypes at 24 with Erysiphe necator
Genotype	Class of compunds	Name of the compounds	Coehen d effect size value	p size value
BC4	primary compunds	2-pyrrolidinone	1.22105e+16	0.025974
BC4	primary compunds	malic_acid	1.80791e+16	0.0021645
BC4	volatile compounds	3-hexen-1-ol-cis	-2.11913e+16	0.00865801
BC4	phenols	t-piceide	1.83828e+16	0.00865801
BC4	phenols	catechin	1.50064e+16	0.0411255
BC4	lipids	ceramide	1.43928e+16	0.0411255
BC4	lipids	linoleic acid	1.49279e+16	0.025974
BC4	lipids	behenic acid	1258815105664390	0.0411255
BC4	lipids	lignoceric acid	1.42257e+16	0.0151515
BC4	lipids	arachidic acid	1.72782e+16	0.0411255
BC4	lipids	oleic acid + cis_vaccenic acid	1.28932e+16	0.0411255
BC4	lipids	palmitic acid	1.21093e+16	0.0411255
Kish	primary compunds	maleic_acid_cis	1.41098e+16	0.0411255
Kish	primary compunds	malic_acid	1.48804e+16	0.025974
Kish	volatile compounds	2,4-hexadienal-isomer1_(trans,cis)	-1.49198e+16	0.030303
Kish	volatile compounds	2,4-heptadienal	-1.41037e+16	0.0411255
Kish	volatile compounds	1-pentanol,3-ethyl-4-methyl	1403998646409990	0.017316
Kish	volatile compounds	1-nonanol	1.79034e+16	0.00865801
Kish	volatile compounds	benzyl_alchool	-2.46139e+16	0.0190476
Kish	phenols	ellagic acid	1.11767e+16	0.0411255
Kish	phenols	quercetin-3-Rha	1.16595e+16	0.047619
Kish	lipids	lignoceric acid	1.80092e+16	0.025974
Kish	lipids	myristic acid	2.35377e+16	0.031746
Terold	primary compunds	isocitric_acid	-2.84352e+16	0.0021645
Terold	primary compunds	myo-inositol	-2.23439e+16	0.0021645
Terold	volatile compounds	2,4-heptadienal	1.6936e+16	0.0021645
Terold	volatile compounds	2_octenal_(E)	3.16782e+16	0.0021645
Terold	volatile compounds	1-hexanol-2-ethyl	2.58299e+16	0.0021645
Terold	volatile compounds	linalool	1.32631e+16	0.0411255
Terold	volatile compounds	tetradecanoic_acid,_ethyl_ester	1.629e+16	0.0151515
Terold	volatile compounds	ethanol 2-phenoxy	1643868371851580	0.025974
Terold	phenols	catechin	-1920653198880310	0.025974
Terold	phenols	epicatechin	-2.31665e+16	0.00865801
Terold	phenols	procyanidin B2 + B4	-1.58484e+16	0.0151515
Terold	lipids	linoleic acid	2262854892591240	0.004329
Terold	lipids	behenic acid	2238468730487300	0.00865801
Terold	lipids	stearic acid	2011139936081730	0.0021645
Terold	lipids	palmitoleic acid	2043301634997210	0.025974
Terold	lipids	lignoceric acid	2.93072e+16	0.0021645
Terold	lipids	erucic acid	2058027059096160	0.004329
Terold	lipids	oleic acid + cis_vaccenic acid	3.66116e+16	0.0021645
Terold	lipids	palmitic acid	3.16441e+16	0.0021645
Terold	phenols	kaempferol-3-rutinoside	-2.07624e+16	0.031746
Bianca	primary compunds	alanine	1.64587e+16	0.030303
Bianca	primary compunds	isoleucine	2.22795e+16	0.00865801
Bianca	primary compunds	aspartic_acid_1	2.23424e+16	0.017316
Bianca	primary compunds	lysine	2140626279099160	0.015873
Bianca	primary compunds	tyrosine	1.5134e+16	0.0411255
Bianca	volatile compounds	tetradecanoic_acid,_ethyl_ester	2161945856064200	0.0151515
Bianca	lipids	linoleic acid	1.74591e+16	0.017316
Bianca	lipids	erucic acid	1333745487347340	0.0411255
Bianca	lipids	arachidic acid	2.02727e+16	0.00865801
Bianca	lipids	oleic acid + cis_vaccenic acid	1.41542e+16	0.025974
Bianca	volatile compounds	1-nonanol	140952291382971	0.031746
F26P92	primary compunds	pinitol	-1.48347e+16	0.015873
F26P92	volatile compounds	penten-3-one	-1.62706e+16	0.0151515
F26P92	volatile compounds	2-pentenal	-2.3476e+16	0.0021645
F26P92	volatile compounds	trans-3-hexenal	-2.23079e+16	0.0021645
F26P92	volatile compounds	cis-3-hexenal	-2798115330700280	0.004329
F26P92	volatile compounds	1-octanol	1702761322128440	0.0151515
F26P92	volatile compounds	benzaldehyde,ethyl	-2306098826900360	0.004329
F26P92	volatile compounds	2(5H)_furanone,_5_ethyl	-4829887440963520	0.0021645
F26P92	volatile compounds	benzyl_alchool	1.3571e+16	0.025974
F26P92	volatile compounds	phenethyl_alcohol	3.85328e+16	0.0021645
F26P92	volatile compounds	hexenoic_acid_(3Z)	-2.57516e+16	0.0021645
F26P92	volatile compounds	unknown-31	-1919321694102610	0.0151515
F26P92	phenols	kaempferol-3-Glc	2.80088e+16	0.00793651
F26P92	lipids	ceramide	2496066668860130	0.004329
F26P92	lipids	linoleic acid	1.9284e+16	0.00865801
F26P92	lipids	linolenic acid	1.37995e+16	0.025974
F26P92	lipids	stearic acid	1739094376461290	0.025974
F26P92	lipids	oleic acid + cis_vaccenic acid	1.47219e+16	0.0411255
F13P71	primary compunds	2-pyrrolidinone	-1.3555e+16	0.0411255
F13P71	volatile compounds	1-heptanol	-1.59845e+16	0.0449512
F13P71	volatile compounds	(E)_geranyl_acetone	1.32287e+16	0.00865801
F13P71	volatile compounds	unknown-31	1.72981e+16	0.025974
F13P71	volatile compounds	octanoic_acid	1.50399e+16	0.0411255
F13P71	volatile compounds	ethanol 2-phenoxy	2322283644223990	0.0151515
F13P71	lipids	1-linoleoyl-rac-glycerol	1.48065e+16	0.0411255
F13P71	lipids	stearic acid	-1.85591e+16	0.025974
F13P71	lipids	oleic acid + cis_vaccenic acid	1575774897149980	0.025974
NY42	primary compunds	tartaric_acid	1.77453e+16	0.017316
NY42	primary compunds	ribose	1.00736e+16	0.030303
NY42	volatile compounds	dodecanoic-acid	-1.92129e+16	0.031746
NY42	phenols	cis-piceide	1.58297e+16	0.0411255
NY42	lipids	1,2 dioleoyl-sn-Glycero-3-phosphocholine	-1.95589e+16	0.00865801
NY42	lipids	1,2 dioleoyl-sn-glycero-3-phospho-rac-(1-glycerol) sodium salt	-2.21969e+16	0.004329
NY42	lipids	stearic acid	1597872723645860	0.025974
NY42	lipids	lignoceric acid	1.36489e+16	0.0411255
NY42	lipids	oleic acid + cis_vaccenic acid	3047424929762790	0.04329

## Sheet: 48hpi
Table 6. The Cohen d effect size and p values of the identified upregulated metabolites for the studied genotypes at 48hpi with Erysiphe necator
Genotype	Class of compunds	Name of the compounds	Coehen d effect size value	p size value
BC4	primary compunds	2-pyrrolidinone	1.44489e+16	0.0151515
BC4	primary compunds	pyridoxal_1	-2712924080951020	0.0021645
BC4	primary compunds	glucuronic_2	-1.31638e+16	0.025974
BC4	volatile compounds	3-hexen-1-ol-cis	-2457832533906350	0.0021645
BC4	volatile compounds	benzaldehyde	-1.63529e+16	0.0151515
BC4	volatile compounds	1-nonanol	1.55073e+16	0.025974
BC4	volatile compounds	phenethyl_alcohol	-1.96531e+16	0.0151515
BC4	phenols	astringin	2010836533998490	0.025974
BC4	phenols	pallidol	1.64185e+16	0.0411255
BC4	phenols	isohopeaphenol	1731316845997900	0.025974
BC4	lipids	1-linoleoyl-rac-glycerol	2079217456016870	0.00865801
BC4	lipids	oleanolic acid	2.18104e+16	0.004329
BC4	lipids	linoleic acid	2.11175e+16	0.004329
BC4	lipids	behenic acid	2.22559e+16	0.025974
BC4	lipids	linolenic acid	1880316722683080	0.0151515
BC4	lipids	palmitoleic acid	1.60741e+16	0.0411255
BC4	lipids	lignoceric acid	1403056329274360	0.0411255
BC4	lipids	erucic acid	2155346834737580	0.0021645
BC4	lipids	arachidic acid	3.32107e+16	0.0021645
BC4	lipids	oleic acid + cis_vaccenic acid	1.8444e+16	0.0151515
BC4	lipids	palmitic acid	1.67559e+16	0.0411255
Kish	primary compunds	2-pyrrolidinone	2.52533e+16	0.0021645
Kish	volatile compounds	1-octanol	-1.69669e+16	0.017316
Kish	volatile compounds	3-nonen-1-ol(cis)	-2086094965631990	0.0380952
Kish	volatile compounds	tetradecanoic_acid,_ethyl_ester	-2003082686513720	0.0238095
Kish	volatile compounds	decanoic_acid	1.85472e+16	0.030303
Kish	phenols	isorhapontin	2.46378e+16	0.004329
Kish	volatile compounds	palmitic_acid,_ethyl_ester	-1.89164e+16	0.0380952
Kish	volatile compounds	benzyl_alchool	-2.91712e+16	0.0238095
Kish	volatile compounds	phenethyl_alcohol	-2.11476e+16	0.0238095
Terold	primary compunds	glyceric_acid	1.79659e+16	0.025974
Terold	primary compunds	glutaric_acid	-1548647318136790	0.025974
Terold	primary compunds	citramalic_acid	2237266832035920	0.004329
Terold	primary compunds	malic_acid	1.64077e+16	0.0151515
Terold	primary compunds	tartaric_acid	1.75019e+16	0.0151515
Terold	primary compunds	xylose_2	2.2792e+16	0.004329
Terold	primary compunds	alpha-rhamnose_1	3529783039738080	0.0021645
Terold	primary compunds	quinic_acid	13450005936601	0.0411255
Terold	primary compunds	galactose_1	1.70733e+16	0.0411255
Terold	primary compunds	glucose_2	1.39394e+16	0.0411255
Terold	primary compunds	5-keto_gluconic_acid_1	1.74591e+16	0.0151515
Terold	primary compunds	glucuronic_2	2.20409e+16	0.00865801
Terold	primary compunds	galacturonic_acid_2	1806167203236500	0.0151515
Terold	volatile compounds	2-pentenal	-1.71748e+16	0.0151515
Terold	volatile compounds	trans-3-hexenal	-1.74933e+16	0.0151515
Terold	volatile compounds	2-hexenal-izomer1	-1.73278e+16	0.0151515
Terold	volatile compounds	3-hexen-1-ol-cis	3429526381759420	0.0021645
Terold	volatile compounds	alpha_terpineol	-2191098914228140	0.00865801
Terold	volatile compounds	methyl_salicylate	1.78783e+16	0.025974
Terold	volatile compounds	heptanoic_acid	1.86144e+16	0.025974
Terold	volatile compounds	hexenoic_acid_(3Z)	-1478489491262430	0.025974
Terold	volatile compounds	tetradecanoic_acid,_ethyl_ester	-2.16319e+16	0.004329
Terold	volatile compounds	octanoic_acid	2.91632e+16	0.0021645
Terold	volatile compounds	nonanoic-acid	1.94522e+16	0.0151515
Terold	phenols	caftaric acid	2.55321e+16	0.0021645
Terold	phenols	catechin	1918610281477180	0.004329
Terold	phenols	epicatechin	2415775560975560	0.004329
Terold	phenols	epigallocatechin	2285483356128790	0.0151515
Terold	phenols	gallocatechin	2.46238e+16	0.00865801
Terold	phenols	procyanidin B1	1.62981e+16	0.0411255
Terold	phenols	t-coutaric acid	1.75074e+16	0.00865801
Terold	lipids	1,2 dioleoyl-sn-glycero-3-phospho-rac-(1-glycerol) sodium salt	-1.72394e+16	0.025974
Terold	lipids	linolenic acid	2.30847e+16	0.0021645
Terold	lipids	stearic acid	1409065477261290	0.0411255
Terold	lipids	erucic acid	1.71047e+16	0.025974
Bianca	primary compunds	valine_1	-1.67027e+16	0.0411255
Bianca	primary compunds	isoleucine	-1.73144e+16	0.030303
Bianca	primary compunds	citramalic_acid	100324391904074	0.0411255
Bianca	primary compunds	tartaric_acid	1.90914e+16	0.00865801
Bianca	primary compunds	fucose_2	-1.52949e+16	0.025974
Bianca	primary compunds	5-keto_gluconic_acid_1	1.72383e+16	0.00865801
Bianca	primary compunds	myo-inositol	-1163394434030850	0.025974
Bianca	primary compunds	sucrose	-1561892831891120	0.025974
Bianca	primary compunds	melibiose_trans	-1.18573e+16	0.0411255
Bianca	volatile compounds	cis-3-hexenal	-2.43903e+16	0.0021645
Bianca	volatile compounds	3-hexen-1-ol-cis	-1.6205e+16	0.0151515
Bianca	volatile compounds	2,4-hexadienal-isomer1_(trans,cis)	-1.8487e+16	0.025974
Bianca	volatile compounds	2,4-hexadienal-isomer2_(trans,trans)	-1.56802e+16	0.0411255
Bianca	volatile compounds	alpha_terpineol	-1551129965214900	0.0151515
Bianca	volatile compounds	2(5H)_furanone,_5_ethyl	-2.391e+16	0.0021645
Bianca	volatile compounds	methyl_salicylate	1.49409e+16	0.025974
Bianca	phenols	caftaric acid	2.02421e+16	0.0151515
Bianca	phenols	t-piceide	1549057178500190	0.0411255
Bianca	phenols	phlorizin	1.68004e+16	0.0411255
Bianca	phenols	gallocatechin	1.46485e+16	0.0411255
Bianca	phenols	quercetin-3-glucuronide	1.58592e+16	0.0021645
Bianca	phenols	isorhapontin	1.67826e+16	0.025974
Bianca	phenols	gallocatechin gallate	2.25784e+16	0.004329
Bianca	phenols	epigallocatechin gallate	2.71207e+16	0.004329
Bianca	phenols	rutin	1.82139e+16	0.004329
Bianca	phenols	arbutin	1.54901e+16	0.0151515
Bianca	phenols	t-coutaric acid	2.27317e+16	0.0021645
Bianca	phenols	astringin	1536663240083320	0.025974
Bianca	phenols	pallidol	1483502017897640	0.025974
Bianca	lipids	arachidic acid	2.2306e+16	0.0021645
Bianca	primary compunds	maleic_acid_cis	1.65457e+16	0.031746
F26P92	volatile compounds	phenethyl_alcohol	1499005220193820	0.0411255
F26P92	phenols	quercetin-3-Glc + quercetin-3-Gal (as que-3-Glc)	1.66667e+16	0.00865801
F26P92	phenols	quercetin-3-glucuronide	1283262424605750	0.0411255
F26P92	lipids	arachidic acid	1.3728e+16	0.0411255
F26P92	primary compunds	phenylalanine_2	2515706193452530	0.017316
F26P92	volatile compounds	6-methyl-5-hepten-2-one	-1.21148e+16	0.031746
F13P71	primary compunds	aspartic_acid_1	-1.31217e+16	0.0411255
F13P71	primary compunds	tyrosine	-1191590562494300	0.0411255
F13P71	volatile compounds	3-hexen-1-ol-cis	-1.90133e+16	0.0190476
F13P71	lipids	1,2 dioleoyl-sn-glycero-3-phospho-rac-(1-glycerol) sodium salt	1977235869322480	0.0411255
F13P71	lipids	oleanolic acid	1.68958e+16	0.0021645
F13P71	lipids	palmitoleic acid	1.56122e+16	0.025974
F13P71	lipids	erucic acid	1.83829e+16	0.0411255
F13P71	lipids	arachidic acid	4359185009782850	0.0021645
NY42	primary compunds	sucrose	-1.06415e+16	0.025974
NY42	volatile compounds	benzaldehyde,ethyl	-1.6126e+16	0.00865801
NY42	phenols	gallic acid	3.31944e+16	0.015873
NY42	phenols	taxifolin	2009599095829340	0.00793651
NY42	phenols	isorhamnetin-3-Glc	2190823450277350	0.00865801
NY42	phenols	kaempferol-3-Glc	2229052761615360	0.004329
NY42	phenols	astringin	1.4993e+16	0.025974
NY42	lipids	behenic acid	2.4891e+16	0.004329
NY42	lipids	arachidic acid	1884750908883970	0.0151515
NY42	primary compunds	myo-inositol	-1883779411848970	0.030303
